# Supplementary material for: Dengue in Latin America: Systematic Review of Molecular Epidemiological Trends
Source: PubMed Central journal article supplement (PMC5221820; doi:10.1371/journal.pntd.0005224), 2017-01-09
Supplement: pntd.0005224.s001.pdf [file pntd.0005224.s001.pdf]

| Source: first author, year [Ref] | Region/ geographical area                                                                                                                                                                                                                                      | Study type                              | Study design                                                                                                                                                                                                                                                                            | Data period: date range/ year | If study:                                                                                                                                                                                     |                              |                                                                                                  |           | Summary of data presentation or results/conclusion                                                                                                                                                                                                                                                                                                                                                                                                                                                                                     |
|----------------------------------|----------------------------------------------------------------------------------------------------------------------------------------------------------------------------------------------------------------------------------------------------------------|-----------------------------------------|-----------------------------------------------------------------------------------------------------------------------------------------------------------------------------------------------------------------------------------------------------------------------------------------|-------------------------------|-----------------------------------------------------------------------------------------------------------------------------------------------------------------------------------------------|------------------------------|--------------------------------------------------------------------------------------------------|-----------|----------------------------------------------------------------------------------------------------------------------------------------------------------------------------------------------------------------------------------------------------------------------------------------------------------------------------------------------------------------------------------------------------------------------------------------------------------------------------------------------------------------------------------------|
|                                  |                                                                                                                                                                                                                                                                |                                         |                                                                                                                                                                                                                                                                                         |                               | No. patients/ population studied (M:F)                                                                                                                                                        | Diagnoses (DF/DHF/ DSS etc.) | Serotype/ genotype (lineage)                                                                     | Age range |                                                                                                                                                                                                                                                                                                                                                                                                                                                                                                                                        |
| Allicock 2012 [72]               | Antigua*, Aruba, Bahamas, Barbados*, Belize*, Grenada*, Jamaica, St Vincent and the Grenadines*, Suriname*, Trinidad and Tobago*<br>*Sequences derived from 2000 onwards; all were DENV-3                                                                      | Phylo-geography and population dynamics | Region: E-gene<br>Size sequence: not shown<br>Sequence number to compare: data sets were down-sampled to no more than five sequences per country per year.<br>For DENV-1 V 109, DENV-2 Asian-American 191, DENV-3 III 226, and DENV-4 II 214<br>Software: BEAST v1.6.1 software package | 1977–2005                     | DENV-1 (n=18) and DENV-3 (n=25) strains isolated from patient sera and DENV-1 genotype 5, DENV-2 American/ Asian genotype, DENV-3 genotype III, and DENV-4 genotype II sequences from GenBank |                              | DENV-1 genotype V<br>DENV-2 Asian–American genotype<br>DENV-3 genotype III<br>DENV-4 genotype II |           | All four DENV serotypes appear to have arisen from a single introduction prior to the first epidemiological reports of the virus in the region. The population genetic histories of DENV-1, DENV-2, and DENV-4 were similar, with an increase in genetic diversity upon introduction, followed by a maintenance phase during which genetic diversity remained stable with only gradual increases or decreases depending on serotype. DENV-3 genotype III had a different population genetic history, with no obvious maintenance phase |
| Aquino 2006 [42]                 | Brazil (Manaus–AM, Araguaia–GO, Goiania–GO, São Geraldo do São Luis–MA, Cuiabá–MT, Bragança–PA, Iguapé Açu-PA, Marituba–PA, Paranapebas–PA, Santarém–PA, Porto Velho–RO, Boa Vista–RR, Ribeirão Preto–SP), Paraguay (Asunción, Fernando de la Mora, Pedro Juan | Molecular epidemiological               | Region: the E protein gene and the 3' and 5' UTRs<br>Size sequence: 1,479 nucleotides of E gen., 94 of 5' UTRs<br>Sequence number to compare: 45 for E gen., 22 for 3' UTRs<br>Software: PAUP 4.0b8a software (Sinauer, Sunderland, MA)                                                 | 2002–2004                     | DENV-3 strains from patients with DF (n=27) or fatal DHF/DSS (n=1)                                                                                                                            | DF                           | DENV-3, genotype III                                                                             |           | DENV-3 was introduced into Brazil from the Caribbean islands at least twice, and into Paraguay from Brazil at least three times. DENV-3 circulating in Brazil and Paraguay grouped with other American viruses and viruses isolated in Sri Lanka and Samoa, belonging to genotype III                                                                                                                                                                                                                                                  |

| Source: first author, year [Ref] | Region/geographical area                                                                                              | Study type                | Study design                                                                                                                                                                                                                                                                                              | Data period: date range/year | If study:                                                         |                             |                                                                                                                                                             |           | Summary of data presentation or results/conclusion                                                                                                                                                                                                                                                                                                                                                                     |
|----------------------------------|-----------------------------------------------------------------------------------------------------------------------|---------------------------|-----------------------------------------------------------------------------------------------------------------------------------------------------------------------------------------------------------------------------------------------------------------------------------------------------------|------------------------------|-------------------------------------------------------------------|-----------------------------|-------------------------------------------------------------------------------------------------------------------------------------------------------------|-----------|------------------------------------------------------------------------------------------------------------------------------------------------------------------------------------------------------------------------------------------------------------------------------------------------------------------------------------------------------------------------------------------------------------------------|
|                                  |                                                                                                                       |                           |                                                                                                                                                                                                                                                                                                           |                              | No. patients/population studied (M:F)                             | Diagnoses (DF/DHF/DSS etc.) | Serotype/genotype (lineage)                                                                                                                                 | Age range |                                                                                                                                                                                                                                                                                                                                                                                                                        |
|                                  | Caballero, Yaguarón)                                                                                                  |                           |                                                                                                                                                                                                                                                                                                           |                              |                                                                   |                             |                                                                                                                                                             |           |                                                                                                                                                                                                                                                                                                                                                                                                                        |
| Aquino 2008 [48]                 | Paraguay (Asunción, Ciudad del Este, Fernando de la Mora, Hernandarias, Itauguá, Luque, Pedro J. Caballero, Yaguarón) | Molecular epidemiological | Open: Bayesian phylogenetic analysis of the nucleotide sequencing of the complete E-gene of 4 x DENV-2 and 22 x DENV-3 strains. Sequencing method: the RT-PCR purified products were sequenced with the BigDye® Terminator v1.1 Cycle Sequencing Kit (Applied Biosystems), followed by purification using | 2001–2006                    | DENV-2 (n=4) and DENV-3 (n=22) strains isolated from patient sera |                             | DENV-2 American/Asian genotype (2 distinct clades possessing either Q or L at E131)<br>DENV-3 genotype III (2 clades closely related to Brazilian isolates) |           | DENV-2 strains fell into two distinct clades within the American/Asian genotype. DENV-3 strains were genotype III, and several 2006 isolates differed notably from earlier isolates. The introduction of these new DENV-2 and DENV-3 clades likely produced a shift of dominant serotype from DENV-3 to DENV-2 in 2005, and from DENV-3 to DENV-2 in 2006, possibly causing DENV-2 and DENV-3 epidemics in those years |

| Source: first author, year [Ref] | Region/ geographical area                                                                 | Study type                                | Study design                                                                                                                                                                                                                                                                             | Data period: date range/ year | If study:                                                                                            |                              |                                                                           |           | Summary of data presentation or results/conclusion                                                                                                                                                                                                                                                                                                                                                         |
|----------------------------------|-------------------------------------------------------------------------------------------|-------------------------------------------|------------------------------------------------------------------------------------------------------------------------------------------------------------------------------------------------------------------------------------------------------------------------------------------|-------------------------------|------------------------------------------------------------------------------------------------------|------------------------------|---------------------------------------------------------------------------|-----------|------------------------------------------------------------------------------------------------------------------------------------------------------------------------------------------------------------------------------------------------------------------------------------------------------------------------------------------------------------------------------------------------------------|
|                                  |                                                                                           |                                           |                                                                                                                                                                                                                                                                                          |                               | No. patients/ population studied (M:F)                                                               | Diagnoses (DF/DHF/ DSS etc.) | Serotype/ genotype (lineage)                                              | Age range |                                                                                                                                                                                                                                                                                                                                                                                                            |
|                                  |                                                                                           |                                           | CENTRI-SEP COLUMNS (Princeton Separations)                                                                                                                                                                                                                                               |                               |                                                                                                      |                              |                                                                           |           |                                                                                                                                                                                                                                                                                                                                                                                                            |
| Aquino 2009 [39]                 | Brazil (Porto Velho-RO), Colombia                                                         | Viral sequencing                          | Comparative: D3BR_PV7_03 strain, isolated in C6/36 cells from the serum sample, had the E and NS1 genes, and the 39UTR region sequenced. Sequence analyses were then aligned with those performed previously worldwide.                                                                  | 2003                          | DENV-3 strain from serum of patient with fatal DHF (N=1) and worldwide DENV-3 sequences from GenBank | DHF                          | DENV-3, genotype V                                                        |           | Phylogenetic analysis showed that DENV-3 genotype V viruses isolated in Brazil and Colombia were closely related to DENV-3 viruses isolated in Asia more than two decades ago.                                                                                                                                                                                                                             |
| Añez 2011 [69]                   | Central America (Belize, Costa Rica, El Salvador, Guatemala, Honduras, Mexico, Nicaragua) | Gene sequencing and phylogenetic analysis | Comparative: detailed study of the phylogenetic relationships of DENV-2 from Central America (most from Nicaragua); report on the first fully sequenced DENV-2 strain from Guatemala. Sequencing method: the entire viral genome of the second passage in C6/36 cells of the isolate was | 1999-2009                     | One isolate                                                                                          | DF                           | DENV-2, American/Asian genotype (at least two lineages; clades 2a and 2b) |           | First report of the phylogeny, molecular clock and selection pressure analysis of DENV-2 in this region. First complete genomic sequence of a Guatemalan DENV strain, and first description from the region of codons subject to positive selection pressure in the DENV genes encoding C, E, NS2A, NS3, and NS5 proteins; some of these codons have not been described previously in any DENV-2 genotype. |

| Source: first author, year [Ref] | Region/ geographical area              | Study type                                    | Study design                                                                                                                                                                                                                                                                                                                                                                    | Data period: date range/ year | If study:                                                                                    |                              |                                                                                                               |           | Summary of data presentation or results/conclusion                                                                                                                                                                                                                               |
|----------------------------------|----------------------------------------|-----------------------------------------------|---------------------------------------------------------------------------------------------------------------------------------------------------------------------------------------------------------------------------------------------------------------------------------------------------------------------------------------------------------------------------------|-------------------------------|----------------------------------------------------------------------------------------------|------------------------------|---------------------------------------------------------------------------------------------------------------|-----------|----------------------------------------------------------------------------------------------------------------------------------------------------------------------------------------------------------------------------------------------------------------------------------|
|                                  |                                        |                                               |                                                                                                                                                                                                                                                                                                                                                                                 |                               | No. patients/ population studied (M:F)                                                       | Diagnoses (DF/DHF/ DSS etc.) | Serotype/ genotype (lineage)                                                                                  | Age range |                                                                                                                                                                                                                                                                                  |
|                                  |                                        |                                               | amplified by RT-PCR and DENV-specific forward and reverse primers, generating 11 overlapping fragments that covered the full genome. The purified PCR products were sequenced using the BigDye Terminator chemistry version 3.1 (Applied Biosystems). The sequences of overlapping fragments were assembled, evaluated and annotated using the software Sequencher, version 4.8 |                               |                                                                                              |                              |                                                                                                               |           |                                                                                                                                                                                                                                                                                  |
| Añez, 2012 [76]                  | Puerto Rico and Key West, Florida, USA | qRT-PCR, sequencing and phylogenetic analyses | DENV RNA was confirmed using qRT-PCR Sequencing method: extracted viral RNA was subjected to RT-PCR by using DENV-specific primers                                                                                                                                                                                                                                              | 2010 epidemic                 | Six plasma samples from donors infected with DENV but asymptomatic at the time of collection | N/A                          | Three DENV-1 and two DENV-4 strains isolated from Puerto Rico and a DENV-1 strain from Key West, Florida, USA | N/A       | Puerto Rico DENV-1 strains constitute a new lineage within genotype V different from those that circulated in Puerto Rico during the previous two decades. The newer Puerto Rico DENV-1 strains associated with strains from the Caribbean and South America. DENV-4 isolates of |

| Source:<br>first author,<br>year [Ref] | Region/<br>geographical area | Study type | Study design                                                                                                                                                                                                                                                                                                                                                                                                                                                           | Data period:<br>date range/<br>year | If study:                                 |                             |                             |           | Summary of data presentation or results/conclusion                                                                                                                    |
|----------------------------------------|------------------------------|------------|------------------------------------------------------------------------------------------------------------------------------------------------------------------------------------------------------------------------------------------------------------------------------------------------------------------------------------------------------------------------------------------------------------------------------------------------------------------------|-------------------------------------|-------------------------------------------|-----------------------------|-----------------------------|-----------|-----------------------------------------------------------------------------------------------------------------------------------------------------------------------|
|                                        |                              |            |                                                                                                                                                                                                                                                                                                                                                                                                                                                                        |                                     | No. patients/<br>population studied (M:F) | Diagnoses (DF/DHF/DSS etc.) | Serotype/genotype (lineage) | Age range |                                                                                                                                                                       |
|                                        |                              |            | to amplify the DENV structural genes region (C-prME). In brief, fragments of approximately 3,700 and 3,500 nucleotides for DENV-1 and DENV-4, respectively, were generated by using the SuperScript III First-Strand Synthesis System (Invitrogen, Carlsbad, CA), LA Taq polymerase (Takara, Otsu, Japan), and specific DENV-1 and DENV-4 primers. Phylogenetic analyses were conducted with E-gene sequences (1,485 nucleotides) in datasets containing a total of 36 |                                     |                                           |                             |                             |           | genotype II associated with strains that have circulated in Puerto Rico throughout the 1980s and 1990s and with strains from the Caribbean region and Central America |

| Source: first author, year [Ref] | Region/ geographical area                                    | Study type                                      | Study design                                                                                                                                                                                                                                                                                                                                                                                                                                                                                                              | Data period: date range/ year | If study:                                |                              |                                                |                                                              | Summary of data presentation or results/conclusion                                                                                                                                                                                                                                                                                                                                     |
|----------------------------------|--------------------------------------------------------------|-------------------------------------------------|---------------------------------------------------------------------------------------------------------------------------------------------------------------------------------------------------------------------------------------------------------------------------------------------------------------------------------------------------------------------------------------------------------------------------------------------------------------------------------------------------------------------------|-------------------------------|------------------------------------------|------------------------------|------------------------------------------------|--------------------------------------------------------------|----------------------------------------------------------------------------------------------------------------------------------------------------------------------------------------------------------------------------------------------------------------------------------------------------------------------------------------------------------------------------------------|
|                                  |                                                              |                                                 |                                                                                                                                                                                                                                                                                                                                                                                                                                                                                                                           |                               | No. patients/ population studied (M:F)   | Diagnoses (DF/DHF/ DSS etc.) | Serotype/ genotype (lineage)                   | Age range                                                    |                                                                                                                                                                                                                                                                                                                                                                                        |
|                                  |                                                              |                                                 | DENV-1 and 30 DENV-4 strains                                                                                                                                                                                                                                                                                                                                                                                                                                                                                              |                               |                                          |                              |                                                |                                                              |                                                                                                                                                                                                                                                                                                                                                                                        |
| Anzai 2004 [77]                  | Dominican Republic (Invivienda District, Santo Domingo City) | Nucleotide sequencing and phylogenetic analysis | Comparative: three DEN-2 virus strains, one isolated from a DHF patient and two from DF patients were compared with other strains belonging to native American and South-East Asian genotypes<br>Sequencing method: RNA was extracted from the viral stock. Synthetic oligonucleotide primer pairs for RT-PCR were designed to amplify overlapping fragments of 500–700 bp spanning the complete DEN-2 genome. PCR products purified using Centri-Sep columns (Princeton separations, Inc.) were directly sequenced using | 2001                          | Paediatric patients with DF or DHF (N=3) | DF; DHF                      | DENV-2, Asian genotype, American-Asian subtype | DF: female, aged 11 y; male, aged 6 y<br>DHF: male, aged 9 y | First genomic characterisation of DENV-2 strains from the Dominican Republic; all had extensive homology with DENV-2 from Martinique, French West Indies and Jamaica. These strains showed 26 amino acid changes that differed from both the South-East-Asian and native-American genotypes. No amino acid differences were observed between strains isolated from DF and DHF patients |

| Source: first author, year [Ref] | Region/ geographical area                                                                                                                                                                            | Study type                                   | Study design                                                                                                                                                                                                                                                                                                                                                                                          | Data period: date range/ year | If study:                                                                                          |                              |                              |           | Summary of data presentation or results/conclusion                                                                                                                                                                                                                                                                                                                                                                                                             |
|----------------------------------|------------------------------------------------------------------------------------------------------------------------------------------------------------------------------------------------------|----------------------------------------------|-------------------------------------------------------------------------------------------------------------------------------------------------------------------------------------------------------------------------------------------------------------------------------------------------------------------------------------------------------------------------------------------------------|-------------------------------|----------------------------------------------------------------------------------------------------|------------------------------|------------------------------|-----------|----------------------------------------------------------------------------------------------------------------------------------------------------------------------------------------------------------------------------------------------------------------------------------------------------------------------------------------------------------------------------------------------------------------------------------------------------------------|
|                                  |                                                                                                                                                                                                      |                                              |                                                                                                                                                                                                                                                                                                                                                                                                       |                               | No. patients/ population studied (M:F)                                                             | Diagnoses (DF/DHF/ DSS etc.) | Serotype/ genotype (lineage) | Age range |                                                                                                                                                                                                                                                                                                                                                                                                                                                                |
|                                  |                                                                                                                                                                                                      |                                              | the BigDye Terminator Cycle Sequencing Ready Reaction kit and an ABI Prism A310 sequence analyser                                                                                                                                                                                                                                                                                                     |                               |                                                                                                    |                              |                              |           |                                                                                                                                                                                                                                                                                                                                                                                                                                                                |
| Avilés 2002 [31]                 | Argentina (9 de Julio, Clorinda, Eldorado, Libertad, Puerto Esperanza, San Pedro, Wanda), Paraguay (Areguá, Asunción, Caaguazú, Capiatá, Ciudad del Este, Fernando de la Mora, Lambaré, San Lorenzo) | Phylogenetic analysis and genomic sequencing | Comparative: analysis of the genomic sequences from the C-prM and the E-NS protein 1 regions of DENV-1 from a Paraguayan isolate from 1988, plus 12 Argentinean and 11 Paraguayan isolates from 2000 were compared with published sequences of DEN-1 isolated from other countries<br>Sequencing method: RT-PCR amplification. Purified PCR products were sequenced using the BigDye Terminator Cycle | 1988–2000                     | DENV-1 isolates from Argentina (n=12) and Paraguay (n=11) from 2000, plus Paraguay (n=1) from 1988 |                              | DENV-1 (clade I and II)      |           | First analysis of the genetic variability of DENV-1 viruses responsible for outbreaks in Argentina and Paraguay. All viruses belonged to the same genotype, but showed some variability and grouped in two different clades. Findings suggest that the recent epidemics in Argentina and Paraguay were not due to the introduction of a new genotype, but rather to the re-emergence of a previously circulating strain, or one that was circulating unnoticed |

| Source: first author, year [Ref] | Region/ geographical area                                                     | Study type         | Study design                                                                                                                                                                                                                                                                                                                                                      | Data period: date range/ year | If study:                                                              |                                                    |                                                             |                                                                                                                                                                                                                                                          | Summary of data presentation or results/conclusion |
|----------------------------------|-------------------------------------------------------------------------------|--------------------|-------------------------------------------------------------------------------------------------------------------------------------------------------------------------------------------------------------------------------------------------------------------------------------------------------------------------------------------------------------------|-------------------------------|------------------------------------------------------------------------|----------------------------------------------------|-------------------------------------------------------------|----------------------------------------------------------------------------------------------------------------------------------------------------------------------------------------------------------------------------------------------------------|----------------------------------------------------|
|                                  |                                                                               |                    |                                                                                                                                                                                                                                                                                                                                                                   |                               | No. patients/ population studied (M:F)                                 | Diagnoses (DF/DHF/ DSS etc.)                       | Serotype/ genotype (lineage)                                | Age range                                                                                                                                                                                                                                                |                                                    |
|                                  |                                                                               |                    | Sequencing Kit (Applied Biosystems, Foster City, CA) and analysed on the ABI PRISM 310 Genetic Analyzer. Amplifying primers were also used for sequencing                                                                                                                                                                                                         |                               |                                                                        |                                                    |                                                             |                                                                                                                                                                                                                                                          |                                                    |
| Avilés 2003 [30]                 | Argentina (Eldorado, Libertad, San Pedro, Wanda) Paraguay (Asunción, Lambaré) | Coding/ sequencing | Comparative: the viral isolates were identified as DENV-1 by indirect immunofluorescence test and by PCR technique. Complete coding sequencing of six DENV-1 isolated from Paraguay and Argentina during outbreaks in 2000<br>Sequencing method: viral RNA was extracted from the infected gene. Amplification was by RT-PCR. Purified PCR products were directly | 2000                          | DENV-1 isolates from patients with DF from Argentina or Paraguay (N=6) | DENV-1, American–African genotype (clade I and II) | Argentina: male (n=4)<br>Paraguay: female (n=1), male (n=1) | The six DENV-1 strains from Argentina and Paraguay group into two different clades of the ‘American-African’ DENV-1 genotype; one clade is most closely related to strains isolated from Brazil in 1997, the other to a Peruvian strain isolated in 1991 |                                                    |



| Source: first author, year [Ref] | Region/ geographical area | Study type                                  | Study design                                                                                                                                                                                                                                                                                                                                                                                 | Data period: date range/ year | If study:                                                                      |                              |                                      |                         | Summary of data presentation or results/conclusion                                                                                                                                                                                                                           |
|----------------------------------|---------------------------|---------------------------------------------|----------------------------------------------------------------------------------------------------------------------------------------------------------------------------------------------------------------------------------------------------------------------------------------------------------------------------------------------------------------------------------------------|-------------------------------|--------------------------------------------------------------------------------|------------------------------|--------------------------------------|-------------------------|------------------------------------------------------------------------------------------------------------------------------------------------------------------------------------------------------------------------------------------------------------------------------|
|                                  |                           |                                             |                                                                                                                                                                                                                                                                                                                                                                                              |                               | No. patients/ population studied (M:F)                                         | Diagnoses (DF/DHF/ DSS etc.) | Serotype/ genotype (lineage)         | Age range               |                                                                                                                                                                                                                                                                              |
|                                  |                           |                                             | sequenced using the BigDye Terminator cycle sequencing kit (Applied Biosystems, Foster City, CA)                                                                                                                                                                                                                                                                                             |                               |                                                                                |                              |                                      |                         |                                                                                                                                                                                                                                                                              |
| Barrero 2004 [32]                | Argentina (Buenos Aires)  | Phylogenetic analysis and sequencing        | Open: DF-compatible cases in Buenos Aires City in patients who had travelled to Paraguay in 1999 and 2000 were identified and blood samples taken. All samples proved positive for DENV-1 by RT-PCR from plasma as well as from cell culture supernatant<br>Sequencing method: RT-PCRs for the structural genes and part of NS1 obtained directly from plasma were cloned into pGemT vectors | 1999 and 2000                 | DENV-1 isolates from patients who travelled to Paraguay in 1999 and 2000 (N=5) | Dengue fever syndrome        | DENV-1, genotype V (clades I and II) |                         | Phylogenetic analysis split Buenos Aires isolates into two clusters within American DENV-1 genotype V. Clade I was phylogenetically linked to Brazilian samples and clade II to samples from Paraguay and north-eastern Argentina. No evidence of recombination was detected |
| Barrero 2008 [47]                | Argentina (Buenos Aires)  | Genetic analysis and phylogenetic inference | Open. structural proteins C, prM/M, E and NS proteins 1                                                                                                                                                                                                                                                                                                                                      | Jan–Sep 2007                  | Febrile patients with a history of recent travel to                            | DF: Classification of cases: | DENV-3, genotype III                 | 6 m–79 y (median 31 y). | First report of DENV-3 genetic characterisation in Argentina. 32/100 (32%) confirmed                                                                                                                                                                                         |

| Source: first author, year [Ref] | Region/ geographical area | Study type | Study design                                                                                                                                                                                                                                                                                                                                                                                                                                                                                                                                 | Data period: date range/ year | If study:                              |                                                          |                              |           | Summary of data presentation or results/conclusion                                                                                                                                                                                                                                                                                                                                                                                                                                                                                                    |
|----------------------------------|---------------------------|------------|----------------------------------------------------------------------------------------------------------------------------------------------------------------------------------------------------------------------------------------------------------------------------------------------------------------------------------------------------------------------------------------------------------------------------------------------------------------------------------------------------------------------------------------------|-------------------------------|----------------------------------------|----------------------------------------------------------|------------------------------|-----------|-------------------------------------------------------------------------------------------------------------------------------------------------------------------------------------------------------------------------------------------------------------------------------------------------------------------------------------------------------------------------------------------------------------------------------------------------------------------------------------------------------------------------------------------------------|
|                                  |                           |            |                                                                                                                                                                                                                                                                                                                                                                                                                                                                                                                                              |                               | No. patients/ population studied (M:F) | Diagnoses (DF/DHF/ DSS etc.)                             | Serotype/ genotype (lineage) | Age range |                                                                                                                                                                                                                                                                                                                                                                                                                                                                                                                                                       |
|                                  |                           |            | and 2 from eight viruses were genetically characterised. Phylogenetic inference was performed for the E-protein and all viruses clustered with DENV-3 genotype III. Sera were obtained 0–6 days after the onset of symptoms from febrile patients with a history of recent travel to Paraguay or Brazil<br>Sequencing method: amplicons were purified, quantified and labelled with DyET Terminator Kit. The reaction products were detected on a MegaBACE 1000 sequencing instrument by capillary electrophoresis (MegaBACE and DYEnamic ET |                               | Brazil or Paraguay (N=100)<br><br>1:1; | non-dengue (n=55), dengue-like (n=13), classic DF (n=32) |                              |           | dengue infection (both PCR- and cell culture-positive [n=18] and both PCR- and IgM-positive [n=14]. According to the IgM/IgG ratio, laboratory-confirmed cases were further classified as primary (n=21; 54%) or secondary (n=16; 41%) dengue infections. Viremic samples: 35/37 positive for DENV-3, 1/37 positive for DENV-2, and 1/37 positive for DENV-4, with a recent history of travel to Paraguay/Brazil, Costa Rica or Venezuela, respectively. Phylogenetic inference using a virus sample subset (n=8) clustered with DENV-3 genotype III. |

| Source: first author, year [Ref] | Region/ geographical area | Study type      | Study design                                                                                                                                                                                                                                                                                                                                                                                                                                                            | Data period: date range/ year | If study:                                                                                                                                                                                                            |                                                             |                                      |           | Summary of data presentation or results/conclusion                                                                                                                                                                                                                                                                                                                                                                                   |
|----------------------------------|---------------------------|-----------------|-------------------------------------------------------------------------------------------------------------------------------------------------------------------------------------------------------------------------------------------------------------------------------------------------------------------------------------------------------------------------------------------------------------------------------------------------------------------------|-------------------------------|----------------------------------------------------------------------------------------------------------------------------------------------------------------------------------------------------------------------|-------------------------------------------------------------|--------------------------------------|-----------|--------------------------------------------------------------------------------------------------------------------------------------------------------------------------------------------------------------------------------------------------------------------------------------------------------------------------------------------------------------------------------------------------------------------------------------|
|                                  |                           |                 |                                                                                                                                                                                                                                                                                                                                                                                                                                                                         |                               | No. patients/ population studied (M:F)                                                                                                                                                                               | Diagnoses (DF/DHF/ DSS etc.)                                | Serotype/ genotype (lineage)         | Age range |                                                                                                                                                                                                                                                                                                                                                                                                                                      |
|                                  |                           |                 | Dye Terminator Cycle Sequencing Kit for MegaBACE                                                                                                                                                                                                                                                                                                                                                                                                                        |                               |                                                                                                                                                                                                                      |                                                             |                                      |           |                                                                                                                                                                                                                                                                                                                                                                                                                                      |
| Brown 2011 [73]                  | Jamaica                   | DENV serotyping | Open: the DENV serotypes were determined in 770 serum samples (dengue IgM antibody positive, n=469; dengue IgM negative, n=185; dengue antibody negative, n=116) taken from patients with suspected dengue who presented during (n=150) or after (n=620) the acute phase of the illness. Serotyping and antibody/RNA analysis using ELISA and RT-PCR performed on serum and cell culture supernatants of C6/36 mosquito cells inoculated with acute phase serum (n=150) | 2003–2007                     | Patients with suspected dengue infection who presented during (n=150) or after (n=620) the acute phase of the illness. Serum samples (N=770): IgM-positive (n=469); IgM-negative, (n=185); antibody-negative (n=116) | DF or non-dengue fevers plus 1 case of DHF in 2007 (DENV-2) | DENV-1<br>DENV-2<br>DENV-3<br>DENV-4 | 8 m–64 y. | 20/770 (2.6%) confirmed dengue infection; male:female: 1:1; . All four serotypes were identified over the 5-year period: DENV-1 (3/20, 15%), DENV-2 (7/20, 35%), DENV-3 (3/20, 15%), DENV-4 (7/20, 35%). DENV-1, -2 and -4 were present during 2007. DENV-2 and -4 were the likely cause of the 2007–08 outbreak in Jamaica. The three strains of DENV-3 were isolated from infants aged <3 years with primary infection during 2006 |
| Brown 2011 [74]                  | Jamaica                   |                 | Dengue antibodies were                                                                                                                                                                                                                                                                                                                                                                                                                                                  | 2003–2007                     | DENV serotypes                                                                                                                                                                                                       | Samples from                                                | All four serotypes were              | N/A       | 41% of acute phase sera and 66% of post-acute sera were                                                                                                                                                                                                                                                                                                                                                                              |

| Source: first author, year [Ref] | Region/ geographical area | Study type | Study design                                                                                                                                                                                                                                                                                                                                                                                                                                                                                                                                  | Data period: date range/ year                                                                                                 | If study:                                                                                                                                    |                                                                                                        |                              |                                                                                                                                                                                                                                                                                                                                                                                                                                                                                                                                                                                                                                                                                                                                                                                                                                                                  | Summary of data presentation or results/conclusion |
|----------------------------------|---------------------------|------------|-----------------------------------------------------------------------------------------------------------------------------------------------------------------------------------------------------------------------------------------------------------------------------------------------------------------------------------------------------------------------------------------------------------------------------------------------------------------------------------------------------------------------------------------------|-------------------------------------------------------------------------------------------------------------------------------|----------------------------------------------------------------------------------------------------------------------------------------------|--------------------------------------------------------------------------------------------------------|------------------------------|------------------------------------------------------------------------------------------------------------------------------------------------------------------------------------------------------------------------------------------------------------------------------------------------------------------------------------------------------------------------------------------------------------------------------------------------------------------------------------------------------------------------------------------------------------------------------------------------------------------------------------------------------------------------------------------------------------------------------------------------------------------------------------------------------------------------------------------------------------------|----------------------------------------------------|
|                                  |                           |            |                                                                                                                                                                                                                                                                                                                                                                                                                                                                                                                                               |                                                                                                                               | No. patients/ population studied (M:F)                                                                                                       | Diagnoses (DF/DHF/ DSS etc.)                                                                           | Serotype/ genotype (lineage) | Age range                                                                                                                                                                                                                                                                                                                                                                                                                                                                                                                                                                                                                                                                                                                                                                                                                                                        |                                                    |
|                                  |                           |            | <p>detected by ELISA and DENV RNA by RT-PCR performed on serum and cell culture supernatants of C6/36 mosquito cells inoculated with acute phase serum.</p> <p>performed in a Perkin Elmer model 9700 thermalcycler (Applied Biosystems, Foster City, CA). The PCR products were detected by agarose gel electrophoresis in lxTris-borate buffer pH8.0 (54g trizma base, 27.5g boric acid, 0.5MEDTA pH8.0/L) using a 2% agarose gel containing ethidium bromide (0.5/g/mL; Sigma Chemic St Louis, Mo) at 100V for 1h then visualized on a</p> | <p>were determined in 770 serum samples selected consecutively from a cohort of 2,248 patients with dengue-like illnesses</p> | <p>dengue IgM antibody-positive (n=469), dengue IgM-negative (n=185) and dengue antibody-negative (n=116) patients with suspected dengue</p> | <p>identified over the five-year period: DENV-1 (15%), DENV-2 (35%), DENV-3 (15%) and DENV-4 (35%)</p> |                              | <p>from patients with current primary or secondary dengue; 41% and 35% of acute and post-acute phase sera, were from patients with secondary dengue or past exposure only. DENV RNA was found in 20/770 samples (2.6%). Only 1.5% (9/620) of sera collected after the acute phase of illness tested positive for DENV RNA compared with 2.6% (4/150) of sera collected during the acute phase and 7.3% of cell culture supernatants inoculated with acute phase serum (11/150, p=0.001). The results confirm that DENV-2 and DENV-4 were the likely causative viruses of the 2007–2008 dengue outbreak in Jamaica. This study highlights the increasing threat of dengue and severe dengue disease to the Jamaican population. Preventative measures including laboratory surveillance and vector control should be strictly maintained at the highest level</p> |                                                    |

| Source: first author, year [Ref] | Region/ geographical area                                                                                                                                                                     | Study type                           | Study design                                                                                                                                                                                                                 | Data period: date range/ year | If study:                                                                                                                           |                              |                                                                                                                                                 |           | Summary of data presentation or results/conclusion                                                                                                                                                                                                                                                                                                                                                                                                                                                                                                                                                       |
|----------------------------------|-----------------------------------------------------------------------------------------------------------------------------------------------------------------------------------------------|--------------------------------------|------------------------------------------------------------------------------------------------------------------------------------------------------------------------------------------------------------------------------|-------------------------------|-------------------------------------------------------------------------------------------------------------------------------------|------------------------------|-------------------------------------------------------------------------------------------------------------------------------------------------|-----------|----------------------------------------------------------------------------------------------------------------------------------------------------------------------------------------------------------------------------------------------------------------------------------------------------------------------------------------------------------------------------------------------------------------------------------------------------------------------------------------------------------------------------------------------------------------------------------------------------------|
|                                  |                                                                                                                                                                                               |                                      |                                                                                                                                                                                                                              |                               | No. patients/ population studied (M:F)                                                                                              | Diagnoses (DF/DHF/ DSS etc.) | Serotype/ genotype (lineage)                                                                                                                    | Age range |                                                                                                                                                                                                                                                                                                                                                                                                                                                                                                                                                                                                          |
|                                  |                                                                                                                                                                                               |                                      | UV trans-illuminator and photographed                                                                                                                                                                                        |                               |                                                                                                                                     |                              |                                                                                                                                                 |           |                                                                                                                                                                                                                                                                                                                                                                                                                                                                                                                                                                                                          |
| Campos 2013 [50]                 | Brazil (Rio de Janeiro)                                                                                                                                                                       | Phylogenetic analyses                | Phylogenetic analysis of DENV-4 strains. The multiple nucleotide sequence alignment was analysed by the Markov Chain Monte Carlo method implemented in the program MrBayes (version 3.0) applying the GTR substitution model | 2011                          |                                                                                                                                     | DF                           | DENV-4, genotype IIb<br>DENV-4, genotype I                                                                                                      |           | Infections serotyped by Rio de Janeiro State Laboratory during 2011 outbreak: 32% DENV-1, with majority of other infections caused by DENV-4. Phylogenetic analysis of DENV-4 strains (n=10) revealed the presence of DENV-4 genotype II b; these strains are closely related to those detected in the city of Roraima in 2010 (strain Br246RR) and the state of São Paulo State in 2011 (strain SPH317947), and strains from Venezuela and Colombia. One characterised strain (RJ1243581) clustered with DENV-4 genotype I and is closely related with strains AM1619 and AM750 from the city of Manaus |
| Carrillo-Valenzo 2010 [67]       | Mexico (15 states: Baja California Sur, Chiapas, Estado de Mexico, Guanajuato, Jalisco, Morelos, Nuevo León, Oaxaca, Queretaro, Quintana Roo, Sinaloa, Sonora, Tabasco, Tamaulipas, Veracruz) | Phylogenetic analysis and sequencing | Open: examination of patterns of sequence evolution in 83 E-gene sequences using immunofluorescence or RT-PCR Sequencing method: E-gene sequencing was                                                                       | 1980–2007                     | E-gene sequences from DENV isolates from patient sera or GenBank (N=83): DENV-1 (n=23), DENV-2 (n=37), DENV-3 (n=10), DENV-4 (n=13) | DF                           | DENV-1, genotype III (three distinct lineages)<br>DENV-2, American genotype<br>DENV-2, Cosmopolitan genotype<br>DENV-2, Asian/American genotype |           | Multiple introductions of DENV viral lineages but strikingly little co-circulation. DENV evolution in Mexico is typified by frequent lineage replacement, involving members of the same viral genotype. A replacement event involving different genotypes was observed with DENV-2, and viral lineages that are new to Mexico are                                                                                                                                                                                                                                                                        |

| Source: first author, year [Ref] | Region/ geographical area                                                     | Study type                           | Study design                                                                                                                                                                                                                                                                                                                                                                                                    | Data period: date range/ year | If study:                                                             |                              |                                                                             |           | Summary of data presentation or results/conclusion                                                                                                                                                                                                                                                                                                   |
|----------------------------------|-------------------------------------------------------------------------------|--------------------------------------|-----------------------------------------------------------------------------------------------------------------------------------------------------------------------------------------------------------------------------------------------------------------------------------------------------------------------------------------------------------------------------------------------------------------|-------------------------------|-----------------------------------------------------------------------|------------------------------|-----------------------------------------------------------------------------|-----------|------------------------------------------------------------------------------------------------------------------------------------------------------------------------------------------------------------------------------------------------------------------------------------------------------------------------------------------------------|
|                                  |                                                                               |                                      |                                                                                                                                                                                                                                                                                                                                                                                                                 |                               | No. patients/ population studied (M:F)                                | Diagnoses (DF/DHF/ DSS etc.) | Serotype/ genotype (lineage)                                                | Age range |                                                                                                                                                                                                                                                                                                                                                      |
|                                  |                                                                               |                                      | performed as described previously (Roca 2009 [57]). Amplicons for direct sequencing were generated by PCR for the entire E-gene                                                                                                                                                                                                                                                                                 |                               |                                                                       |                              | DENV-3, genotype III (three lineages)<br>DENV-4, genotype II (two lineages) |           | described for DENV-1, DENV-3 and DENV-4                                                                                                                                                                                                                                                                                                              |
| Cisneros 2006 [70]               | Mexico (Oaxaca: cities of Huatulco, Juchitan, Salina Cruz, Tonala, Tuxtpepex) | Phylogenetic analysis and sequencing | Open: the nucleotide sequence of the C and a portion of the prM protein genes of 8 DENV-2 isolated from acute-phase plasma from patients with DF and DHF from the 2000/2001 epidemic were sequenced<br>Sequencing method: a fragment with the expected size of 594 bp (23 bp of the UTR-5 region, nucleotide 73–96, the structural C protein gene and nucleotides 438–572 of the prM gene) was amplified by RT- | 2001                          | DENV-2 isolates from acute-phase plasma of patients with DF/DHF (N=8) | DF/DHF: 1:1                  | DENV-2, American/Asian genotype                                             |           | DENV-2 isolates were of the American/Asian genotype and were most similar to the Jamaica and Venezuelan isolates MARA3, LARD1996 and LARD1910. DENV-2 strains of American/Asian genotype, probably from South-East Asia, are circulating in Oaxaca. All of these genotypes have the potential to cause DHF, independently of the host or environment |

| Source: first author, year [Ref] | Region/ geographical area                                                                                                                                      | Study type                           | Study design                                                                                                                                                                                                                                                               | Data period: date range/ year | If study:                                                                           |                              |                                                           |           | Summary of data presentation or results/conclusion                                                                                                                                                                                                                                                                                                                                                                                                                     |
|----------------------------------|----------------------------------------------------------------------------------------------------------------------------------------------------------------|--------------------------------------|----------------------------------------------------------------------------------------------------------------------------------------------------------------------------------------------------------------------------------------------------------------------------|-------------------------------|-------------------------------------------------------------------------------------|------------------------------|-----------------------------------------------------------|-----------|------------------------------------------------------------------------------------------------------------------------------------------------------------------------------------------------------------------------------------------------------------------------------------------------------------------------------------------------------------------------------------------------------------------------------------------------------------------------|
|                                  |                                                                                                                                                                |                                      |                                                                                                                                                                                                                                                                            |                               | No. patients/ population studied (M:F)                                              | Diagnoses (DF/DHF/ DSS etc.) | Serotype/ genotype (lineage)                              | Age range |                                                                                                                                                                                                                                                                                                                                                                                                                                                                        |
|                                  |                                                                                                                                                                |                                      | PCR using Super Script™ One-Step RT-PCR with Platinum R Taq. For automated sequencing, spin column-purified (Quiagen, Chatsworth, Calif.) DNA fragments were analysed by the cycle-sequencing dye terminator method. BigDye Terminator Cycle Sequencing Ready Reaction kit |                               |                                                                                     |                              |                                                           |           |                                                                                                                                                                                                                                                                                                                                                                                                                                                                        |
| Cruz 2010 [54]                   | Peru (including provinces of Amazonas, Cajamarca, Huánuco, Junín, La Libertad, Lambayeque, Loreto, Madre de Dios, Piura, San Martín, Tumbes, Ucayali), Ecuador | Phylogenetic analysis and sequencing | Comparative: DENV-2 was obtained from acute-phase sera collected from patients enrolled in the febrile surveillance programme from 1995 to 2009. Sequences generated from E/NS1 gene junction and ENV gen. were compared to global                                         | 1995–2009                     | DENV-2 isolates from acute-phase sera from patients in Peru (n=41) or Ecuador (n=5) |                              | DENV-2, American genotype DENV-2, American/Asian genotype |           | American and American/Asian DENV-2 genotypes co-circulated during the Peruvian north-western outbreak in 2000, with the former disappearing from 2001 onwards. Both genotypes were similar to those isolated in Ecuador during a dengue outbreak prior to 2000. American/Asian genotypes circulating from 2002–09 in the Amazon region were more closely related to Brazilian DENV-2 strains. Peruvian DENV-2 American/Asian genotypes fell into two clades, formed by |

| Source: first author, year [Ref] | Region/ geographical area        | Study type                           | Study design                                                                                                                                                                                                                                                                       | Data period: date range/ year | If study:                                                                                                                                                                                                                    |                              |                                                                                                                                                    |           | Summary of data presentation or results/conclusion                                                                                                                                                                                                                                                                                                                                                                                                                 |
|----------------------------------|----------------------------------|--------------------------------------|------------------------------------------------------------------------------------------------------------------------------------------------------------------------------------------------------------------------------------------------------------------------------------|-------------------------------|------------------------------------------------------------------------------------------------------------------------------------------------------------------------------------------------------------------------------|------------------------------|----------------------------------------------------------------------------------------------------------------------------------------------------|-----------|--------------------------------------------------------------------------------------------------------------------------------------------------------------------------------------------------------------------------------------------------------------------------------------------------------------------------------------------------------------------------------------------------------------------------------------------------------------------|
|                                  |                                  |                                      |                                                                                                                                                                                                                                                                                    |                               | No. patients/ population studied (M:F)                                                                                                                                                                                       | Diagnoses (DF/DHF/ DSS etc.) | Serotype/ genotype (lineage)                                                                                                                       | Age range |                                                                                                                                                                                                                                                                                                                                                                                                                                                                    |
|                                  |                                  |                                      | sequences obtained from GenBank Sequencing method: viral RNA (5 from Ecuador and 41 from Peru) extracted using the QIAamp Viral RNA Mini Kit (QIAGEN) and amplified using RT-PCR. RT-PCR products from E/NS1 and E regions were sequenced directly using the BigDye sequencing kit |                               |                                                                                                                                                                                                                              |                              |                                                                                                                                                    |           | isolations from 2000–09 and 2009. DENV-2 strain sequences from Madre de Dios during the 2009 outbreak grouped in different clades and showed a temporal circulation of genetically different viruses in the Amazon region. The same American/Asian genotype clades previously identified in Paraguay and Brazil were also found to be circulating in Peru, but unlike in those countries, the DENV-2 virus was not displaced by DENV-3 in 2009                     |
| Cruz 2013 [55]                   | Bolivia, Ecuador, Paraguay, Peru | Phylogenetic analysis and sequencing | Comparative: the E-gene region of DENV-2 isolates was sequenced. Sequences were aligned and compared to a global sample of DENV-2 viruses Sequencing method: RT-PCR was performed to amplify the entire 1485 bp E-gene. Amplicons were purified with Centri-Sep                    | 2000–2012                     | DENV-2 isolates from acute-phase sera (N=56): Bolivia (n=11), Ecuador (n=2), Paraguay (n=3), Peru (n=40: north-west [Piura and Tumbes, n=9], north-eastern Amazon basin [Loreto, n=17], eastern Amazon basin [Ucayali, n=3], |                              | DENV-2, American genotype DENV-2, American/Asian genotype (lineage I, clades A and B) DENV-2, American/Asian genotype (lineage II, clades E and F) |           | The DENV-2 American and American/Asian genotypes were found in Peru; the former appeared to become extinct after 2000, to be replaced by the latter. The emergence of the American/Asian genotype coincided with an increase in disease severity. DENV-2 American/Asian genotype sequences from Peru are divided into two clearly defined lineages, with lineage II replacing lineage I after 2009. Since 2000, the evolution of DENV-2 American/Asian genotype in |



| Source: first author, year [Ref] | Region/ geographical area                                                                                                                                                                                                                                                                            | Study type                           | Study design                                                                                                                                                                                                                                                   | Data period: date range/ year | If study:                                                     |                              |                                                                                                                |           | Summary of data presentation or results/conclusion                                                                                                                                                                                                                                                                                                                                                                                                                                                                                                            |
|----------------------------------|------------------------------------------------------------------------------------------------------------------------------------------------------------------------------------------------------------------------------------------------------------------------------------------------------|--------------------------------------|----------------------------------------------------------------------------------------------------------------------------------------------------------------------------------------------------------------------------------------------------------------|-------------------------------|---------------------------------------------------------------|------------------------------|----------------------------------------------------------------------------------------------------------------|-----------|---------------------------------------------------------------------------------------------------------------------------------------------------------------------------------------------------------------------------------------------------------------------------------------------------------------------------------------------------------------------------------------------------------------------------------------------------------------------------------------------------------------------------------------------------------------|
|                                  |                                                                                                                                                                                                                                                                                                      |                                      |                                                                                                                                                                                                                                                                |                               | No. patients/ population studied (M:F)                        | Diagnoses (DF/DHF/ DSS etc.) | Serotype/ genotype (lineage)                                                                                   | Age range |                                                                                                                                                                                                                                                                                                                                                                                                                                                                                                                                                               |
|                                  |                                                                                                                                                                                                                                                                                                      |                                      | columns (Invitrogen) and sequenced directly using the BigDye Terminator sequencing kit version 3.1 (Applied Biosystems)                                                                                                                                        |                               | south-eastern Amazon basin [Madre de Dios, n=10], Junin, n=1) |                              |                                                                                                                |           | Peru can be characterised by the introduction of four different clades within lineages I and II. Lineages I and II were both independently introduced into north-western Peru (via Ecuador, Colombia, and/or Venezuela; lineage I clade A in 2000, lineage II clade E in 2011) and eastern Peru (via Brazil and/or Bolivia; lineage I clade B in 2002, lineage II clade F in 2009). Lineage II clade F is distinct from those previously circulating in the region, and a particularly virulent strain that is associated with the large DHF epidemic in 2010 |
| de Araújo 2009 [40]              | 30 countries worldwide (Bangladesh, Bolivia, Brazil, China, Cuba, East Timor, Ecuador, Fiji, French Polynesia, India, Indonesia, Japan, Malaysia, Martinique, Mexico, Myanmar, Nicaragua, Panama, Paraguay, Peru, Philippines, Puerto Rico, Singapore, Somalia, Sri Lanka, Tahiti, Taiwan, Thailand, | Phylogenetic analysis and sequencing | Open: retrieved and analysed the full-length (1,479 bp) and partial (822 bp) E-gene sequences of 103 DENV-3 strains from 30 different countries around the world, representative of all known genotypes. Tree reconstructions were performed by the Neighbour- | None given                    | DENV-3 E-gene sequences from GenBank (N=103)                  |                              | DENV-3, genotype I<br>DENV-3, genotype II<br>DENV-3, genotype III<br>DENV-3, genotype IV<br>DENV-3, genotype V |           | Phylogenetic analysis of DENV-3 sequences isolated in Brazil and Colombia confirmed their classification as GV. An unpublished DENV-3 E sequence with a high similarity score to the GV strains, deposited in the GenBank database in 2006, corresponded to a virus isolated in state of Pará, Brazil, in 1989. This contrasts with official records that DENV-3 was first isolated in Brazil from an autochthonous case in 2000. The GV Brazilian strains were also unexpectedly similar to the prototype DENV-3 strain                                      |

| Source: first author, year [Ref] | Region/ geographical area                                                                       | Study type                                                  | Study design                                                                                                                                                                                                                                                                                                                                                                                                          | Data period: date range/ year | If study:                                                       |                              |                                                                                                                |           | Summary of data presentation or results/conclusion                                                                                                                                                                                                                                                                                                                                                                                                                                                            |
|----------------------------------|-------------------------------------------------------------------------------------------------|-------------------------------------------------------------|-----------------------------------------------------------------------------------------------------------------------------------------------------------------------------------------------------------------------------------------------------------------------------------------------------------------------------------------------------------------------------------------------------------------------|-------------------------------|-----------------------------------------------------------------|------------------------------|----------------------------------------------------------------------------------------------------------------|-----------|---------------------------------------------------------------------------------------------------------------------------------------------------------------------------------------------------------------------------------------------------------------------------------------------------------------------------------------------------------------------------------------------------------------------------------------------------------------------------------------------------------------|
|                                  |                                                                                                 |                                                             |                                                                                                                                                                                                                                                                                                                                                                                                                       |                               | No. patients/ population studied (M:F)                          | Diagnoses (DF/DHF/ DSS etc.) | Serotype/ genotype (lineage)                                                                                   | Age range |                                                                                                                                                                                                                                                                                                                                                                                                                                                                                                               |
|                                  | Venezuela, Vietnam)                                                                             |                                                             | Joining method in 1,000 bootstrapped data sets                                                                                                                                                                                                                                                                                                                                                                        |                               |                                                                 |                              |                                                                                                                |           | identified in the Philippines in 1956                                                                                                                                                                                                                                                                                                                                                                                                                                                                         |
| de Araújo 2009 [A]               | 31 countries worldwide                                                                          | Phylogenetic analysis                                       | Open: viral isolation, followed by viral RNA extraction, amplification and sequencing of E-gene region, phylogenetic analysis, and analysis of spatio-temporal dispersion pattern<br>Sequencing method: the complete E-gene (1,479 bp in length) was amplified by RT-PCR. Amplicons were directly sequenced in both directions using a BigDye Terminator Cycle Sequencing Ready Reaction kit (Applied Biosystems, US) | 1956–2006                     | DENV-3 E sequences from GenBank (N=200)                         |                              | DENV-3, genotype I<br>DENV-3, genotype II<br>DENV-3, genotype III<br>DENV-3, genotype IV<br>DENV-3, genotype V |           | Phylogenetic analysis revealed a clear geographical subdivision of DENV-3 strains. Strains more recently isolated in the Americas (1994–2006) segregated into distinct monophyletic clusters within the main genotypes, indicating formation of a geographically distinct, mostly self-contained region with regard to DENV-3 viruses, with few instances of repeated gene flow. Phylogeographic analysis revealed that the co-circulation of different DENV-3 genotypes in a single location is a rare event |
| de Araújo 2012 [46]              | Brazil (states of Espírito Santo, Goiás, Rio de Janeiro), comparing with 29 countries worldwide | Reconstruction of the spatio-temporal dispersion pattern of | Open: viral isolation, followed by viral RNA extraction, amplification and sequencing of E-                                                                                                                                                                                                                                                                                                                           | 1981–2009                     | Brazilian patients with confirmed DENV-3 infection (N=19): from |                              | DENV-3, genotype III<br><br>GenBank DENV-3 E-gene sequences:                                                   |           | At least four introductions of the same DENV-3 genotype III in Brazil; only two viral lineages seem to have become established and disseminated. The Caribbean                                                                                                                                                                                                                                                                                                                                                |

| Source: first author, year [Ref] | Region/ geographical area | Study type                                            | Study design                                                                                                                                                                                                                                                                                                                    | Data period: date range/ year | If study:                                                                                 |                              |                                                                               |           | Summary of data presentation or results/conclusion                                                                                                                                                                                                                                                                                               |
|----------------------------------|---------------------------|-------------------------------------------------------|---------------------------------------------------------------------------------------------------------------------------------------------------------------------------------------------------------------------------------------------------------------------------------------------------------------------------------|-------------------------------|-------------------------------------------------------------------------------------------|------------------------------|-------------------------------------------------------------------------------|-----------|--------------------------------------------------------------------------------------------------------------------------------------------------------------------------------------------------------------------------------------------------------------------------------------------------------------------------------------------------|
|                                  |                           |                                                       |                                                                                                                                                                                                                                                                                                                                 |                               | No. patients/ population studied (M:F)                                                    | Diagnoses (DF/DHF/ DSS etc.) | Serotype/ genotype (lineage)                                                  | Age range |                                                                                                                                                                                                                                                                                                                                                  |
|                                  |                           | DENV-3 lineage circulating in Brazil and the Americas | gene region, phylogenetic analysis, and analysis of spatio-temporal dispersion pattern<br>Sequencing method: the complete E-gene (1,479 bp in length) was then amplified by RT-PCR. Amplicons were directly sequenced in both directions using a BigDye Terminator Cycle Sequencing Ready Reaction kit (Applied Biosystems, US) |                               | states of Espirito Santo (n =3), Goias (n =4), Rio de Janeiro (n=12) states               |                              | from Brazil in 2001–2009 (n=107), 29 countries worldwide in 1981–2009 (n=457) |           | islands were the main source of the DENV-3 viruses, and the northern and south-eastern Brazilian regions seem to be the most important hubs of introduction and dissemination. DENV-3 strains circulated for ≥ 1–2 years until they met favourable conditions for the initiation of an outbreak                                                  |
| de Castro 2013 [38]              | Brazil (Rio de Janeiro)   | Phylogenetic and vector-virus-human host              | Open: sequencing of the entire genome of one DENV-3 isolate from <i>Aedes aegypti</i> (n=4) and naturally infected human hosts (n=10) from Rio de Janeiro between 2001 and 2008; characterisation of the 3' UTR in comparison with                                                                                              | 2001–2008                     | DENV-3 isolates from <i>Aedes aegypti</i> (n=4) and naturally infected human hosts (n=10) |                              | DENV-3, genotype III                                                          |           | Based on analysis of the complete genome and 3' UTR, DENV-3 isolated from both vector and human host was genotype III. The majority of DENV-3 isolates were characterised by an 11-nucleotide insertion in the 3' UTR, although strains carrying an 8-nucleotide deletion, or a substitution leading to stop codon formation, were also observed |

| Source: first author, year [Ref] | Region/ geographical area | Study type                                 | Study design                                                                                                                                                                                                                                                                                              | Data period: date range/ year | If study:                                                         |                              |                                                     |           | Summary of data presentation or results/conclusion                                                                                                                                                                               |
|----------------------------------|---------------------------|--------------------------------------------|-----------------------------------------------------------------------------------------------------------------------------------------------------------------------------------------------------------------------------------------------------------------------------------------------------------|-------------------------------|-------------------------------------------------------------------|------------------------------|-----------------------------------------------------|-----------|----------------------------------------------------------------------------------------------------------------------------------------------------------------------------------------------------------------------------------|
|                                  |                           |                                            |                                                                                                                                                                                                                                                                                                           |                               | No. patients/ population studied (M:F)                            | Diagnoses (DF/DHF/ DSS etc.) | Serotype/ genotype (lineage)                        | Age range |                                                                                                                                                                                                                                  |
|                                  |                           |                                            | strains isolated from naturally infected mosquitoes and humans<br>Sequencing method: viral RNA was extracted using QIAamp Viral RNA Mini kit (Qiagen). After RT-PCR amplification, PCR products were sequenced in both directions using the BigDye Dideoxy Terminator sequencing kit (Applied Biosystems) |                               |                                                                   |                              |                                                     |           |                                                                                                                                                                                                                                  |
| Figueiredo 2008 [51]             | Brazil (Manaus)           | Serological and molecular characterisation | Open: all serum samples collected during acute phase of illness and tested for DENV infection by three methods: virus culture; detection of IgM antibodies to DENV by an ELISA on serum samples from patients >7 days after onset of symptoms;                                                            | January 2005 to June 2007     | DENV-4 isolates from patients at a tropical medicine centre (N=3) |                              | DENV-4<br>DENV-4 co-infected with DENV-3 (1 sample) |           | DENV-4 was detected in 3 samples by virus culture or RT-PCR, either as a single infection (n=2) or as a co-infecting virus with DENV-3 (n=1). Patients had no travel history, indicating that DENV-4 was autochthonous in Manaus |

| Source: first author, year [Ref] | Region/ geographical area                                                                  | Study type                           | Study design                                                                                                                                                                                                                                                                    | Data period: date range/ year | If study:                                                                                                      |                              |                                         |           | Summary of data presentation or results/conclusion                                                                                                                                                                          |
|----------------------------------|--------------------------------------------------------------------------------------------|--------------------------------------|---------------------------------------------------------------------------------------------------------------------------------------------------------------------------------------------------------------------------------------------------------------------------------|-------------------------------|----------------------------------------------------------------------------------------------------------------|------------------------------|-----------------------------------------|-----------|-----------------------------------------------------------------------------------------------------------------------------------------------------------------------------------------------------------------------------|
|                                  |                                                                                            |                                      |                                                                                                                                                                                                                                                                                 |                               | No. patients/ population studied (M:F)                                                                         | Diagnoses (DF/DHF/ DSS etc.) | Serotype/ genotype (lineage)            | Age range |                                                                                                                                                                                                                             |
|                                  |                                                                                            |                                      | nucleic acid amplification and typing by RT-PCR<br>Sequencing method: amplicons were cloned into a TA vector (Invitrogen), and >3 colonies for each sample were sequenced in both directions by using the BigDye Terminator Cycle Sequence Kit                                  |                               |                                                                                                                |                              |                                         |           |                                                                                                                                                                                                                             |
| de Mora 2009 [62]                | Ecuador, comparing with 11 other Latin American countries and 20 other countries worldwide | Phylogenetic analysis and sequencing | Open: nine serum samples from 23 Ecuadorian patients with dengue-like syndromes were found to be DENV-3. Full-length E-gene nucleotide sequences, corresponding to position 1,014 through 2,413 of the DENV genome, were obtained from these nine patients, and aligned with 48 | None given                    | DENV-3 genotype III sequences from patient isolates (n=9) and GenBank (Latin America [n=48], elsewhere [n=20]) | DF                           | DENV-3 genotype III (at least 6 clades) |           | At least 6 different DENV-3 genotype III clades were observed. Amino acids substitutions were found in domain III E protein neutralisation epitopes and in surface-exposed domain II and III E protein amino acid sequences |

| Source: first author, year [Ref] | Region/ geographical area                               | Study type                                    | Study design                                                                                                                                                                                                                                                                                                                                                                                                                                    | Data period: date range/ year | If study:                                                                        |                              |                              |           | Summary of data presentation or results/conclusion                                                                                                                                 |
|----------------------------------|---------------------------------------------------------|-----------------------------------------------|-------------------------------------------------------------------------------------------------------------------------------------------------------------------------------------------------------------------------------------------------------------------------------------------------------------------------------------------------------------------------------------------------------------------------------------------------|-------------------------------|----------------------------------------------------------------------------------|------------------------------|------------------------------|-----------|------------------------------------------------------------------------------------------------------------------------------------------------------------------------------------|
|                                  |                                                         |                                               |                                                                                                                                                                                                                                                                                                                                                                                                                                                 |                               | No. patients/ population studied (M:F)                                           | Diagnoses (DF/DHF/ DSS etc.) | Serotype/ genotype (lineage) | Age range |                                                                                                                                                                                    |
|                                  |                                                         |                                               | comparable sequences of DENV-3 from strains isolated in 11 different Latin American countries, as well as with 20 sequences from all DENV-3 genotypes isolated elsewhere<br>Sequencing method: samples underwent RT-PCR and amplicons were purified using a QIAquick PCR Purification Kit from QIAGEN. The sequence reaction was carried out using the BigDye DNA sequencing kit (Perkin–Elmer) on a 373 DNA sequencer apparatus (Perkin–Elmer) |                               |                                                                                  |                              |                              |           |                                                                                                                                                                                    |
| de Souza 2011 [52]               | Brazil (states of Parana, Rio Grande do Sul, São Paulo) | Bayesian phylogenetic analysis and sequencing | Comparative: nucleotide sequences of the E-gene were determined and compared with sequences                                                                                                                                                                                                                                                                                                                                                     | Feb– March 2011               | Isolates from patient sera of autochthonous strains of DENV-4 (number not given) |                              | DENV-4, genotype II          |           | All DENV-4 samples were genotype II, and closely related to strains circulating since 1981 in South America, but having undergone recent evolution for ≥4–6 years. DENV-4 may have |

| Source: first author, year [Ref] | Region/ geographical area     | Study type                           | Study design                                                                                                                                                                                                                                                                                                                                                                                                                                                | Data period: date range/ year | If study:                              |                              |                                    |           | Summary of data presentation or results/conclusion                                                                                                                                                                                                |
|----------------------------------|-------------------------------|--------------------------------------|-------------------------------------------------------------------------------------------------------------------------------------------------------------------------------------------------------------------------------------------------------------------------------------------------------------------------------------------------------------------------------------------------------------------------------------------------------------|-------------------------------|----------------------------------------|------------------------------|------------------------------------|-----------|---------------------------------------------------------------------------------------------------------------------------------------------------------------------------------------------------------------------------------------------------|
|                                  |                               |                                      |                                                                                                                                                                                                                                                                                                                                                                                                                                                             |                               | No. patients/ population studied (M:F) | Diagnoses (DF/DHF/ DSS etc.) | Serotype/ genotype (lineage)       | Age range |                                                                                                                                                                                                                                                   |
|                                  |                               |                                      | representative of genotypes I, II, III and sylvatic for DENV-4 retrieved from GenBank. All new DENV-4 strains characterised in this study were isolated directly from patient serum and detected by RT-PCR<br>Sequencing method: total RNA was extracted from infected cells. RT-PCR products were purified and directly sequenced using the BigDye v.3.1 Terminator chemistry. Sequences were determined using the Applied Biosystems 3130XL DNA sequencer |                               |                                        |                              |                                    |           | penetrated the Brazilian population earlier than 2010, being present but not detected, due to a higher prevalence of DENV-1 and DENV-2, and the failure of the surveillance system to identify the milder disease commonly associated with DENV-4 |
| dos Santos 2011 [25]             | Brazil (Rio de Janeiro state) | Phylogenetic analysis and sequencing | Open: DENV-1 strains (n=10; from 1986 [n=2], 2009 [n=3], 2010                                                                                                                                                                                                                                                                                                                                                                                               | None given, but likely late   | DENV-1 E-gene sequences from two       |                              | DENV-1 genotype V (America/Africa) |           | First report of multiple DENV-1 lineages circulating in Brazil. DENV-1 isolated during 2009–10 belonged to                                                                                                                                        |

| Source: first author, year [Ref] | Region/ geographical area                       | Study type                           | Study design                                                                                                                                                                                                                                                                                                                                                                                                                                                                                                  | Data period: date range/ year | If study:                                                       |                              |                                     |           | Summary of data presentation or results/conclusion                                                                                                                                                                         |
|----------------------------------|-------------------------------------------------|--------------------------------------|---------------------------------------------------------------------------------------------------------------------------------------------------------------------------------------------------------------------------------------------------------------------------------------------------------------------------------------------------------------------------------------------------------------------------------------------------------------------------------------------------------------|-------------------------------|-----------------------------------------------------------------|------------------------------|-------------------------------------|-----------|----------------------------------------------------------------------------------------------------------------------------------------------------------------------------------------------------------------------------|
|                                  |                                                 |                                      |                                                                                                                                                                                                                                                                                                                                                                                                                                                                                                               |                               | No. patients/ population studied (M:F)                          | Diagnoses (DF/DHF/ DSS etc.) | Serotype/ genotype (lineage)        | Age range |                                                                                                                                                                                                                            |
|                                  |                                                 |                                      | [n=4] and 2011 [n=1]) extracted directly from serum previously detected by RT-PCR or originally isolated from cell culture. Viral RNA was extracted from infected cell culture supernatant or directly from the patients' serum for RT-PCR and sequencing<br>Sequencing method: amplification of the C/prM/M/E region of 2,325 bp. Sequencing reactions performed as recommended in the BigDye Dideoxy Terminator sequencing kit (Applied Biosystems) and were analysed using an automated 3130 DNA Sequencer | 2010–2011                     | epidemiologically distinct periods: 1986 (n=2), 2009–2011 (n=8) |                              | (three distinct clades)             |           | genotype V (Americas/Africa), but grouped in a distinct clade (lineage II) to that of earlier DENV-1 isolates (lineage I). However, strains isolated in 2011 grouped together to form another distinct clade (lineage III) |
| Drumond 2012 [29]                | Brazil (São José do Rio Preto, São Paulo state) | Phylogenetic analysis and sequencing | Open: different lineages of 59 complete                                                                                                                                                                                                                                                                                                                                                                                                                                                                       | 2008                          | Genomic sequences from DENV-1                                   |                              | DENV-1, genotype V (three lineages) |           | All isolates belonged to genotype V and are subdivided into three                                                                                                                                                          |



| Source: first author, year [Ref] | Region/ geographical area                       | Study type                           | Study design                                                                                                                                                                                                                                                                                                                | Data period: date range/ year | If study:                                                                                                      |                              |                                                           |           | Summary of data presentation or results/conclusion                                                                                                                                                                                                                                                                                                                                                                               |
|----------------------------------|-------------------------------------------------|--------------------------------------|-----------------------------------------------------------------------------------------------------------------------------------------------------------------------------------------------------------------------------------------------------------------------------------------------------------------------------|-------------------------------|----------------------------------------------------------------------------------------------------------------|------------------------------|-----------------------------------------------------------|-----------|----------------------------------------------------------------------------------------------------------------------------------------------------------------------------------------------------------------------------------------------------------------------------------------------------------------------------------------------------------------------------------------------------------------------------------|
|                                  |                                                 |                                      |                                                                                                                                                                                                                                                                                                                             |                               | No. patients/ population studied (M:F)                                                                         | Diagnoses (DF/DHF/ DSS etc.) | Serotype/ genotype (lineage)                              | Age range |                                                                                                                                                                                                                                                                                                                                                                                                                                  |
|                                  |                                                 |                                      | genome sequences were defined based on the branching patterns of the phylogenetic tree (supported by bootstrap values C98%)<br>Sequencing method: viral cDNA was amplified by PCR; 96 amplicons, each 500–900 nucleotides in length, were bidirectionally sequenced using the Big Dye chemistry on ABI3730xl DNA sequencers |                               | isolates from serum of patient diagnosed with DF (n=1), and from GenBank (n=59)                                |                              |                                                           |           | lineages, which were introduced during four different events (1984–85, 1997–99, and two events in 2004–07 ). The introduction of new strains resulted in lineage replacement and an increase in DENV-1 genetic diversity, but not positive selection<br>DENV-1 dynamics in Brazil characterised by co-circulation and generation of genetically distinct viruses as a result of local evolution, or exogenous virus introduction |
| Drumond 2013 [36]                | Brazil (São José do Rio Preto, São Paulo state) | Phylogenetic analysis and sequencing | Open: the whole ORF or E-sequences were used to perform phylogenetic, phylogeographic and evolutionary analyses. Isolates from São José do Rio Preto/São Paulo were grouped within one lineage (BR3) close to isolates                                                                                                      | 2008                          | Genomic sequences from DENV-2 isolates from sera of patients diagnosed with DF (n=12), and from GenBank (n=79) | DF                           | DENV-2, American/Asian genotype (three distinct lineages) |           | DENV-2 isolates clustered in the BR3 lineage with two Brazilian strains from the northern region and a strain isolated in Jamaica in 2007. All DENV-2 isolates grouped within the American/Asian genotype, together with isolates from South and Central America and the Caribbean, as previously demonstrated for other Brazilian isolates                                                                                      |

| Source: first author, year [Ref] | Region/ geographical area              | Study type                           | Study design                                                                                                                                                                                                                                                                     | Data period: date range/ year | If study:                                                                                                                                                                    |                              |                              |           | Summary of data presentation or results/conclusion                                                                                                                                                                                               |
|----------------------------------|----------------------------------------|--------------------------------------|----------------------------------------------------------------------------------------------------------------------------------------------------------------------------------------------------------------------------------------------------------------------------------|-------------------------------|------------------------------------------------------------------------------------------------------------------------------------------------------------------------------|------------------------------|------------------------------|-----------|--------------------------------------------------------------------------------------------------------------------------------------------------------------------------------------------------------------------------------------------------|
|                                  |                                        |                                      |                                                                                                                                                                                                                                                                                  |                               | No. patients/ population studied (M:F)                                                                                                                                       | Diagnoses (DF/DHF/ DSS etc.) | Serotype/ genotype (lineage) | Age range |                                                                                                                                                                                                                                                  |
|                                  |                                        |                                      | from Rio de Janeiro, Brazil<br>Sequencing method: PCR reactions produced 96 overlapping amplicons, each 500–900 nucleotides in length, which were subsequently sequenced bidirectionally using the Big Dye chemistry on ABI3730xl DNA sequencers                                 |                               |                                                                                                                                                                              |                              |                              |           |                                                                                                                                                                                                                                                  |
| Dussart 2006 [82]                | French Guiana and the French Caribbean | Phylogenetic analysis and sequencing | Comparative. 8 DENV-4 strains isolated from human sera, 6 from French Guiana in 1993–5 and 2 from 2004–5; .also 2 human serum specimens from Martinique and 1 from Guadeloupe that were positive for DENV-4 during dengue surveillance in the fourth quarter of 2004 were tested | 2004–2005, versus 1993–1995   | DENV-4 isolates from patient sera (1993–1995: French Guiana, n=6; 2004–2005: French Guiana, n=2; Guadeloupe, n=1; Martinique, n=2), and DENV-4 sequences from GenBank (n=87) |                              | DENV-4, genotype II          |           | DENV- 4 has recently re-emerged in Martinique, Guadeloupe, and French Guiana. Phylogenetic analyses of strains isolated from 2004–5 showed that they belong to DENV-4 genotype II, but to a different cluster than strains isolated from 1993–95 |

| Source: first author, year [Ref] | Region/ geographical area        | Study type                                           | Study design                                                                                                                                                                                                                                                                                                            | Data period: date range/ year | If study:                                                                                                                                                        |                              |                                                      |           | Summary of data presentation or results/conclusion                                                                                                                                                                                                                                                                                                                                                            |
|----------------------------------|----------------------------------|------------------------------------------------------|-------------------------------------------------------------------------------------------------------------------------------------------------------------------------------------------------------------------------------------------------------------------------------------------------------------------------|-------------------------------|------------------------------------------------------------------------------------------------------------------------------------------------------------------|------------------------------|------------------------------------------------------|-----------|---------------------------------------------------------------------------------------------------------------------------------------------------------------------------------------------------------------------------------------------------------------------------------------------------------------------------------------------------------------------------------------------------------------|
|                                  |                                  |                                                      |                                                                                                                                                                                                                                                                                                                         |                               | No. patients/ population studied (M:F)                                                                                                                           | Diagnoses (DF/DHF/ DSS etc.) | Serotype/ genotype (lineage)                         | Age range |                                                                                                                                                                                                                                                                                                                                                                                                               |
|                                  |                                  |                                                      | Sequencing method: DENV-4 infection was confirmed by using virus isolation on AP 61 cells. A 1,940-bp region of the genome for the E-gene and adjacent prM/M and NS1 junctions were analysed. Each PCR product was cloned by using the TOPOTA Cloning kit . For each isolate, 3 clones were sequenced by Genome Express |                               |                                                                                                                                                                  |                              |                                                      |           |                                                                                                                                                                                                                                                                                                                                                                                                               |
| Faria 2013 [33]                  | Brazil (6 states, not specified) | Molecular characterisation and phylogenetic analysis | Comparative: viral strains isolated from patients presenting different disease manifestations (n=34) were sequenced and compared with reference strains. All strains were determined as DENV-2                                                                                                                          | 1990–2010                     | Full-length or partial gene sequences from DENV-2 isolates from patients presenting with DF (n=19), DHF (n=3), DSS (n=1), and GenBank (n=22, worldwide isolates) | DF, DHF, DSS                 | DENV-2, Southeast Asian genotype (lineages I and II) |           | DENV-2 strains comprised two epidemiologically distinct groups: one represented by strains isolated from 1990–2003 (South-East Asian genotype lineage I) and one from strains isolated from 2007–10 (South-East Asian genotype lineage II). The percentage identity of the latter with a Dominican Republic strain isolated in 2001, combined with the percentage of divergence with strains first introduced |

| Source: first author, year [Ref] | Region/ geographical area                                                         | Study type                           | Study design                                                                                                                                                                                                                                                                                                                                                                                                                                              | Data period: date range/ year | If study:                                  |                              |                                                  |           | Summary of data presentation or results/conclusion                                                        |
|----------------------------------|-----------------------------------------------------------------------------------|--------------------------------------|-----------------------------------------------------------------------------------------------------------------------------------------------------------------------------------------------------------------------------------------------------------------------------------------------------------------------------------------------------------------------------------------------------------------------------------------------------------|-------------------------------|--------------------------------------------|------------------------------|--------------------------------------------------|-----------|-----------------------------------------------------------------------------------------------------------|
|                                  |                                                                                   |                                      |                                                                                                                                                                                                                                                                                                                                                                                                                                                           |                               | No. patients/ population studied (M:F)     | Diagnoses (DF/DHF/ DSS etc.) | Serotype/ genotype (lineage)                     | Age range |                                                                                                           |
|                                  |                                                                                   |                                      | serotype by RT-PCR and/or virus isolation<br>Sequencing method: viral RNA was extracted using QIAamp Viral RNA Mini kit (Qiagen) and subject to RT-PCR amplification. Amplification of C/prM/M/E region of 2,325 bp produced amplicons; sequencing reactions were performed as recommended in the BigDye Dideoxy Terminator sequencing kit (Applied Biosystems) and the products were analysed using an automated 3130 DNA Sequencer (Applied Biosystems) |                               |                                            |                              |                                                  |           | into the country in the 1990s, suggests that these were a new viral lineage introduced from the Caribbean |
| Forshey 2009 [66]                | Peru (north-eastern region): Guayaquil (Ecuador), Iquitos, Lima, Piura, Trujillo, | Phylogenetic analysis and sequencing | Comparative: patient sera were injected into African                                                                                                                                                                                                                                                                                                                                                                                                      | 2000–March 2009               | E-gene sequences from DENV-4 isolates from |                              | DENV-4 genotype II (different clades for 2000 vs |           | From 2000–8, DENV-3 (n=1,572 isolates) was the dominant serotype in circulation in the study sites,       |

| Source: first author, year [Ref] | Region/ geographical area | Study type | Study design                                                                                                                                                                                                                                                                                                                                                                                                                                                                                                  | Data period: date range/ year | If study:                                                                                 |                              |                                                                                                                                                                                                                                                                                                                                                                                                                                                                                                                          |           | Summary of data presentation or results/conclusion                                                                                                                                                                                                                                                                                             |
|----------------------------------|---------------------------|------------|---------------------------------------------------------------------------------------------------------------------------------------------------------------------------------------------------------------------------------------------------------------------------------------------------------------------------------------------------------------------------------------------------------------------------------------------------------------------------------------------------------------|-------------------------------|-------------------------------------------------------------------------------------------|------------------------------|--------------------------------------------------------------------------------------------------------------------------------------------------------------------------------------------------------------------------------------------------------------------------------------------------------------------------------------------------------------------------------------------------------------------------------------------------------------------------------------------------------------------------|-----------|------------------------------------------------------------------------------------------------------------------------------------------------------------------------------------------------------------------------------------------------------------------------------------------------------------------------------------------------|
|                                  |                           |            |                                                                                                                                                                                                                                                                                                                                                                                                                                                                                                               |                               | No. patients/ population studied (M:F)                                                    | Diagnoses (DF/DHF/ DSS etc.) | Serotype/ genotype (lineage)                                                                                                                                                                                                                                                                                                                                                                                                                                                                                             | Age range |                                                                                                                                                                                                                                                                                                                                                |
|                                  | Tumbes, Yurimaguas        |            | green monkey Vero cells or <i>Ae. albopictus</i> C6/36 cells and examined for a range of arboviruses, including all 4 DENV serotypes, by immuno-fluorescent assay<br>Sequencing method: to characterise the DENV-4 isolates, a 1,485-bp sequence covering the entire mature E-gene was amplified and sequenced (no details given) from a representative set of viruses from Guayaquil (n=6), Tumbes (n=6), Piura (n=2), Trujillo (n=1), Iquitos (n=9), Yurimaguas (n=7), and Lima (n=2), all collected during |                               | Guayaquil (n=6), Iquitos (n=9), Lima (n=2), Piura (n=2), Trujillo (n=1), Yurimaguas (n=7) |                              | 2006–2009 isolates: 2000 strains clustered more closely with a previous 1994 Ecuador isolate, related to the initial 1981 Caribbean DENV-4 strains [designated as subtype A]; 2006–2009 isolates most closely related to recent DENV-4 isolates from Venezuela, and formed a lineage distinct from previously published DENV-4 Caribbean basin strains; this lineage is distinguished from previously reported DENV-4 genotype II strains by 3 conserved amino acid variations in the E protein: S64L, A235T, and S403A) |           | followed by DENV-1 (n=205 isolates) and DENV-2 (n=87 isolates). DENV-4 was rare until 2006–07. By October 2008, DENV-4 had almost completely displaced DENV-3. Phylogenetic analysis of 2008–09 isolates support their inclusion into DENV-4 genotype II, forming a lineage distinct from strains that had previously circulated in the region |

| Source: first author, year [Ref] | Region/ geographical area          | Study type                                                                                          | Study design                                                                                                                                                                                                                                 | Data period: date range/ year                                                                            | If study:                                                                                                                                                                                                                          |                              |                                                                                                   |                                                                                                                                                                                                                   | Summary of data presentation or results/conclusion                                                                                                                                                                                                                                                                                                                                                                                                                                                                                                                                                                                                                                                                                                                              |
|----------------------------------|------------------------------------|-----------------------------------------------------------------------------------------------------|----------------------------------------------------------------------------------------------------------------------------------------------------------------------------------------------------------------------------------------------|----------------------------------------------------------------------------------------------------------|------------------------------------------------------------------------------------------------------------------------------------------------------------------------------------------------------------------------------------|------------------------------|---------------------------------------------------------------------------------------------------|-------------------------------------------------------------------------------------------------------------------------------------------------------------------------------------------------------------------|---------------------------------------------------------------------------------------------------------------------------------------------------------------------------------------------------------------------------------------------------------------------------------------------------------------------------------------------------------------------------------------------------------------------------------------------------------------------------------------------------------------------------------------------------------------------------------------------------------------------------------------------------------------------------------------------------------------------------------------------------------------------------------|
|                                  |                                    |                                                                                                     |                                                                                                                                                                                                                                              |                                                                                                          | No. patients/ population studied (M:F)                                                                                                                                                                                             | Diagnoses (DF/DHF/ DSS etc.) | Serotype/ genotype (lineage)                                                                      | Age range                                                                                                                                                                                                         |                                                                                                                                                                                                                                                                                                                                                                                                                                                                                                                                                                                                                                                                                                                                                                                 |
|                                  |                                    |                                                                                                     | 2000 through 2009                                                                                                                                                                                                                            |                                                                                                          |                                                                                                                                                                                                                                    |                              |                                                                                                   |                                                                                                                                                                                                                   |                                                                                                                                                                                                                                                                                                                                                                                                                                                                                                                                                                                                                                                                                                                                                                                 |
| Gutierrez 2011 [71]              | Nicaragua (District II of Managua) | Two parallel studies of paediatric dengue: i) hospital-based ii) community-based prospective cohort | DENV RNA detected by RT-PCR (after extraction from serum samples by using the QIAamp Viral RNA Mini Kit (Qiagen, Valencia, California); seroconversion is demonstrated by DENV-specific IgM capture ELISA antibody titre by inhibition ELISA | Hospital-based study: 1998–2010; cohort study: 2004–2010; focus on time period during 2009–2010 epidemic | Hospital-based study (August 2009 to January 2010): N=396<br>Cohort study (August 2009 to June 2010): N=3,711 (Hospital-based study: 166:166 (2005–2009), 106:106 (2009–2010); Cohort study: 95:86 (2004–2009), 85:85 (2009–2010)) | DF, DHF, DSS                 | DENV-2<br>DENV-3, Asian-American genotype (no changes in genotype or clade between 2008 and 2011) | Hospital-based study: 6 m–14 y, mean (SE): 7.2 (2.6) y (2004–2009), 8.2 (3.0) y (2009–2010); p=0.002<br>Cohort study: 2–14 y, mean (range): 8.4 (4.8–11.5) y (2004–2009), 8.6 (5.2–10.8) y (2009–2010); p=0.8831. | Hospital-based study: 212/396 (54%) confirmed dengue infection (August 2009 to January 2010); majority were DENV-3 serotype (88.8%); Cohort study: 170/3,711 (4.6%) confirmed dengue infection (August 2009 to June 2010); majority were DENV-3 serotype (83.9%); The 2009–10 dengue epidemic in Managua involved an atypical presentation, with early onset of signs of poor peripheral perfusion (DF with compensated shock). Multivariate analysis revealed only study year 2009–10 as a significant risk factor for DF with compensated shock. In 2009, the circulation of pandemic influenza A H1N1 overlapped with the dengue season in Managua. The unusual presentation of dengue may have been partly due to immunomodulation by a prior influenza H1N1-2009 infection |
| Huhtamo 2013 [B]                 | Venezuela                          | Molecular epidemiological                                                                           | Open: sequence analysis was performed for 122 DENV-2 envelope gene sequences                                                                                                                                                                 | 1995–2005                                                                                                | E-gene sequences from DENV-2 isolates (n=23) and GenBank (n=99, of                                                                                                                                                                 | DF, DHF                      | DENV-2, American-Asian genotype (6 genetic lineages)                                              |                                                                                                                                                                                                                   | Isolates fell into 6 genetic lineages exclusively within the American-Asian genotype, suggesting that DENV-2 has undergone genetic diversification locally                                                                                                                                                                                                                                                                                                                                                                                                                                                                                                                                                                                                                      |

| Source: first author, year [Ref] | Region/ geographical area                                                                                                                    | Study type                           | Study design                                                                                                                                                                                                                                                                                             | Data period: date range/ year | If study:                                                         |                              |                                    |           | Summary of data presentation or results/conclusion                                                                                                                                                                                                                                                                                                |
|----------------------------------|----------------------------------------------------------------------------------------------------------------------------------------------|--------------------------------------|----------------------------------------------------------------------------------------------------------------------------------------------------------------------------------------------------------------------------------------------------------------------------------------------------------|-------------------------------|-------------------------------------------------------------------|------------------------------|------------------------------------|-----------|---------------------------------------------------------------------------------------------------------------------------------------------------------------------------------------------------------------------------------------------------------------------------------------------------------------------------------------------------|
|                                  |                                                                                                                                              |                                      |                                                                                                                                                                                                                                                                                                          |                               | No. patients/ population studied (M:F)                            | Diagnoses (DF/DHF/ DSS etc.) | Serotype/ genotype (lineage)       | Age range |                                                                                                                                                                                                                                                                                                                                                   |
|                                  |                                                                                                                                              |                                      | including the 23 DENV-2 strains sequenced in this study and 55 Venezuelan DENV-2 viruses for which the complete E-gene sequence was available in the GenBank database<br>Sequencing method: E-gene regions were amplified by RT-PCR and directly sequenced using a set of DENV-2 E-gene-specific primers |                               | which n=55 from Venezuelan DENV-2 strains)                        |                              |                                    |           | in Venezuela since the 1980s. Venezuelan DENV-2 strains were only partly temporally clustered, suggesting co-circulation of variable strains, and had some unique E-gene codon changes                                                                                                                                                            |
| Kochel 2008 [59]                 | Peru (Piura, Tumbes [coastal]; Iquitos, Yurimaguas [jungle cities]; Lima), Bolivia (Santa Cruz), Ecuador (Cañar, Guayas), Venezuela (Aragua) | Phylogenetic analysis and sequencing | Comparative: sequencing of C/prM/M and E-genes from 22 DENV-3 strains and comparison with other DENV-3 subtype III viruses<br>Sequencing method: PCR amplified a sequence of 2,273-bp fragment from positions 278–2,550 encompassing                                                                     | 2000–2005                     | C, prM/M, E-gene sequences from DENV-3 strains and GenBank (n=22) |                              | DENV-3, subtype III (three clades) |           | All viruses isolated in 2000–5 belonged to DENV-3 genotype III, but were divided into three genetic lineages, comprising strains from Venezuela, Peru–Ecuador and Bolivia–Brazil. The most recent DENV-3 viruses currently circulating in South America have evolved and form phylogenetic groups that are distinct from those of Central America |

| Source: first author, year [Ref] | Region/ geographical area                            | Study type                           | Study design                                                                                                                                                                                                                                               | Data period: date range/ year | If study:                                                                                  |                              |                                |           | Summary of data presentation or results/conclusion                                                                                                                                                                                                                                                                                                                              |
|----------------------------------|------------------------------------------------------|--------------------------------------|------------------------------------------------------------------------------------------------------------------------------------------------------------------------------------------------------------------------------------------------------------|-------------------------------|--------------------------------------------------------------------------------------------|------------------------------|--------------------------------|-----------|---------------------------------------------------------------------------------------------------------------------------------------------------------------------------------------------------------------------------------------------------------------------------------------------------------------------------------------------------------------------------------|
|                                  |                                                      |                                      |                                                                                                                                                                                                                                                            |                               | No. patients/ population studied (M:F)                                                     | Diagnoses (DF/DHF/ DSS etc.) | Serotype/ genotype (lineage)   | Age range |                                                                                                                                                                                                                                                                                                                                                                                 |
|                                  |                                                      |                                      | regions of part of C, prM/M and E-genes. Sequence analyses were performed on an automated Applied Biosystems 3100 Avant Genetic Analyzer DNA sequencer. Gel purified PCR products were sequenced directly using the BigDye Terminator Cycle Sequencing Kit |                               |                                                                                            |                              |                                |           |                                                                                                                                                                                                                                                                                                                                                                                 |
| Mamani 2011 [56]                 | Peru (Iquitos, Lima, Tarapoto, Trujillo, Yurimaguas) | Phylogenetic analysis and sequencing | Comparative: analysis of 8 samples collected during dengue surveillance and comparison with others reported in the Genbank Sequencing method: viral RNA was extracted and E/ NS1 amplicons were sequenced and analysed by phylogeny                        | November 2010 to January 2011 | Gene sequences from DENV-2 isolates collected during dengue surveillance and GenBank (n=8) |                              | DENV-2 American/Asian genotype |           | Peruvian DENV-2 isolates from a severe dengue outbreak in 2010 were American/Asian genotype, and closely related to DENV-2 isolates circulating in Brazil during 2007–8, which were similarly associated with severe dengue cases and deaths. The 2010 isolates were genetically distinct from those circulating in Peru in 2001, which were not associated with severe disease |
| Mendez 2010 [53]                 | Colombia                                             | Phylogenetic analysis                | DENV serotype identified by                                                                                                                                                                                                                                | Samples collected             | 74 viruses obtained from                                                                   | N/A                          | DENV-1                         | N/A       | DENV-1 Colombian isolates belonged to the formerly                                                                                                                                                                                                                                                                                                                              |



| Source: first author, year [Ref] | Region/ geographical area                                                           | Study type                                                  | Study design                                                                                                                                                                                                                                                                                                                                                                                                                                          | Data period: date range/ year | If study:                                                   |                              |                              |           | Summary of data presentation or results/conclusion                                                                                                                                                                                                       |
|----------------------------------|-------------------------------------------------------------------------------------|-------------------------------------------------------------|-------------------------------------------------------------------------------------------------------------------------------------------------------------------------------------------------------------------------------------------------------------------------------------------------------------------------------------------------------------------------------------------------------------------------------------------------------|-------------------------------|-------------------------------------------------------------|------------------------------|------------------------------|-----------|----------------------------------------------------------------------------------------------------------------------------------------------------------------------------------------------------------------------------------------------------------|
|                                  |                                                                                     |                                                             |                                                                                                                                                                                                                                                                                                                                                                                                                                                       |                               | No. patients/ population studied (M:F)                      | Diagnoses (DF/DHF/ DSS etc.) | Serotype/ genotype (lineage) | Age range |                                                                                                                                                                                                                                                          |
|                                  |                                                                                     |                                                             | monoclonal antibodies and confirmed by RT-PCR. Cell culture supernatants were used to extract viral RNA using QIAamp Viral RNA Minikit (Qiagen) Sequencing method: amplified products (from RT-PCR or nested PCR) were purified using QIAquick PCR Purification Kit (QIAGEN, Germany) and then used as template for sequencing reactions using the ABI Prism Dye Terminator Cycle Sequencing Ready Reaction Kit (Applied Biosystems, Foster City, CA) | 1978–2007                     | symptomatic patients were isolated in mosquito cell culture |                              |                              |           | defined genotype V; only one virus isolate was genotype I. The oldest strains were closely related to those detected for the first time in America in 1977 from the Caribbean. A split in 1987 generated two lineages that have been evolving separately |
| Mondini 2009 [43]                | Brazil (São José do Rio Preto city, in the north-western region of São Paulo state) | Reconstruction of the spatio-temporal dispersion pattern of | Open: geographic and temporally structured phylogenetic                                                                                                                                                                                                                                                                                                                                                                                               | January to June 2006          | Gene sequences from sera of patients presenting             | DF, DH                       | DENV-3 (two lineages)        |           | All samples were DENV-3 and related to strains circulating on Martinique in 2000–01. DENV-3 from São José do Rio Preto formed a                                                                                                                          |

| Source: first author, year [Ref] | Region/ geographical area                                           | Study type                           | Study design                                                                                                                                                                                                                                                                 | Data period: date range/ year | If study:                                                                                                      |                              |                                                                                                 |           | Summary of data presentation or results/conclusion                                                                                                                                                                                                               |
|----------------------------------|---------------------------------------------------------------------|--------------------------------------|------------------------------------------------------------------------------------------------------------------------------------------------------------------------------------------------------------------------------------------------------------------------------|-------------------------------|----------------------------------------------------------------------------------------------------------------|------------------------------|-------------------------------------------------------------------------------------------------|-----------|------------------------------------------------------------------------------------------------------------------------------------------------------------------------------------------------------------------------------------------------------------------|
|                                  |                                                                     |                                      |                                                                                                                                                                                                                                                                              |                               | No. patients/ population studied (M:F)                                                                         | Diagnoses (DF/DHF/ DSS etc.) | Serotype/ genotype (lineage)                                                                    | Age range |                                                                                                                                                                                                                                                                  |
|                                  |                                                                     | DENV-3 lineages                      | data, to examine the spread of at least 2 DENV lineages circulating in an urban area<br>Sequencing method: viral RNA was extracted and following 2 PCRs the fragments were purified and sequenced with the BigDye v3.1 Terminator (Applied Biosystems, Foster City, CA, USA) |                               | with dengue-like symptoms (n=82)                                                                               |                              |                                                                                                 |           | monophyletic group (lineage 1; n=60), closely related to the remaining isolates (lineage 2; n=22). These lineages are assumed to have appeared before 2006 on separate occasions                                                                                 |
| Nogueira 2008 [41]               | Brazil (Acre, Porto Velho, Rio Branco and Rondônia, Rio de Janeiro) | Phylogenetic analysis and sequencing | Comparative: complete genome sequencing of the samples, which were then compared with other sequences<br>Sequencing method: complete genomes were amplified by means of overlapping RT-PCR products. The amplicons were directly sequenced using                             | 2002–2004                     | Genomic sequences from DENV-3 isolates from sera of patients diagnosed with DF (n=9), and from GenBank (n=114) | DF                           | Rondônia (2002): DENV-3 genotypes V; Rio de Janeiro (2002) and Acre (2004): DENV-3 genotype III |           | Brazilian DENV-3 isolates grouped into two separate clades, comprising strains from Acre/Porto Velho/Rio de Janeiro (all genotype III) and Rondônia (genotype Very [South-East Asia/South Pacific]). Co-circulation of genotypes III and V was found in Rondônia |

| Source: first author, year [Ref] | Region/ geographical area           | Study type                                                                         | Study design                                                                                                                                                                                                                                                                 | Data period: date range/ year | If study:                                                                                                           |                              |                              |                                                                            | Summary of data presentation or results/conclusion                                                                                                                                                                                                                                                                                                                                                                                                         |
|----------------------------------|-------------------------------------|------------------------------------------------------------------------------------|------------------------------------------------------------------------------------------------------------------------------------------------------------------------------------------------------------------------------------------------------------------------------|-------------------------------|---------------------------------------------------------------------------------------------------------------------|------------------------------|------------------------------|----------------------------------------------------------------------------|------------------------------------------------------------------------------------------------------------------------------------------------------------------------------------------------------------------------------------------------------------------------------------------------------------------------------------------------------------------------------------------------------------------------------------------------------------|
|                                  |                                     |                                                                                    |                                                                                                                                                                                                                                                                              |                               | No. patients/ population studied (M:F)                                                                              | Diagnoses (DF/DHF/ DSS etc.) | Serotype/ genotype (lineage) | Age range                                                                  |                                                                                                                                                                                                                                                                                                                                                                                                                                                            |
|                                  |                                     |                                                                                    | a Thermo Sequenase kit (USB Inc, Ohio, USA) on an ABI3100 device, with the Big-Dye7 Terminator method (Applied Biosystems, Warrington, UK)                                                                                                                                   |                               |                                                                                                                     |                              |                              |                                                                            |                                                                                                                                                                                                                                                                                                                                                                                                                                                            |
| Nogueira 2008 [44]               | Brazil (São José do Rio Preto city) | Molecular characterisation and phylogenetic analysis                               | Comparative: blood samples from patients with DF and DHF symptoms were tested by RT-PCR; DENV-3 positive samples were sequenced (82 sequences) and compared with 52 reference sequences for phylogenetic reconstruction. The spatio-temporal dispersion pattern was analysed | 2006                          | NS5 gene sequences from DENV-3 isolates from sera of patients diagnosed with DF/DHF (n=82), and from GenBank (n=52) | DF, DHF                      | DENV-3 (two lineages)        |                                                                            | DENV-3 samples were closely related to strains circulating in Martinique and Brazil. Sixty samples formed a monophyletic group, representing lineage 1, and 22 samples formed lineage 2. The basic reproductive rate was 3.765 for lineage 1 and 3.093 for lineage 2. Both lineages appear to have split 1–3 years before the last collected sample, propagating in different regions of the city: north-western (lineage 1) and south-eastern (lineage 2) |
| Nogueira 2005 [37]               | Brazil (Rio de Janeiro)             | Description of laboratory and clinical findings of patients from the 2002 epidemic | Open: virus isolation and typing was performed, RNA extraction and RT-PCR was carried out, and dengue IgM-                                                                                                                                                                   | January to June 2002          | Acute- and convalescent-phase serum specimens, CSF, fresh tissues from patients (N=1,559)                           | DF, DHF                      | DENV-3                       | 1–73 y (DENV-3 patients), 7–65 y (fatal cases only); even age distribution | 831/1,559 (53.3%) confirmed dengue infection (fatal cases: 297); majority were DENV-3 serotype (99%); male:female: 1:1.08 (DENV-3 patients), 1:1.26 (fatal cases only). Neurological involvement in 1 patient with encephalitis,                                                                                                                                                                                                                           |

| Source: first author, year [Ref] | Region/ geographical area                                                                               | Study type                                                                                              | Study design                                                                                                                                                                                                                                                    | Data period: date range/ year | If study:                                                                   |                              |                                           |                                                                                                                | Summary of data presentation or results/conclusion                                                                                                                                                                                                                                                                                                                                                     |
|----------------------------------|---------------------------------------------------------------------------------------------------------|---------------------------------------------------------------------------------------------------------|-----------------------------------------------------------------------------------------------------------------------------------------------------------------------------------------------------------------------------------------------------------------|-------------------------------|-----------------------------------------------------------------------------|------------------------------|-------------------------------------------|----------------------------------------------------------------------------------------------------------------|--------------------------------------------------------------------------------------------------------------------------------------------------------------------------------------------------------------------------------------------------------------------------------------------------------------------------------------------------------------------------------------------------------|
|                                  |                                                                                                         |                                                                                                         |                                                                                                                                                                                                                                                                 |                               | No. patients/ population studied (M:F)                                      | Diagnoses (DF/DHF/ DSS etc.) | Serotype/ genotype (lineage)              | Age range                                                                                                      |                                                                                                                                                                                                                                                                                                                                                                                                        |
|                                  |                                                                                                         |                                                                                                         | capture was achieved by ELISA. Dengue infections were confirmed by virus isolation or viral RNA detection by RT-PCR, by IgM and/or IgG seroconversion, or by the demonstration of DENV antigen in formalised fixed autopsy tissues by immunohistochemical tests |                               |                                                                             |                              |                                           | among all patients: 10.5% were 1–10 y; each 10-y age group thereafter accounted for 16.9–19.9% of all patients | confirmed by DENV-3 RNA in CSF                                                                                                                                                                                                                                                                                                                                                                         |
| Nunes 2012 [49]                  | Brazil (northern: Boa Vista, Roraima; Manaus, Amazonas; Santarém, Pará; north-eastern: Salvador, Bahia) | Genetic characterisation and reconstruction of the spatio-temporal dispersion pattern of DENV-4 strains | Comparative Bayesian phylogeographic analysis on 98 full-length DENV-4 genomes compared with a similar analysis on 314 envelope gene sequences<br>Sequencing method: nearly complete genome sequences were obtained by using high-throughput sequencing on a    | 2010–2011                     | Genomic or E-gene sequences from DENV-4 isolates (n=16) and GenBank (n=396) |                              | DENV-4, genotype I<br>DENV-4, genotype II |                                                                                                                | Two distinct DENV-4 genotypes (I, II) co-circulate in Brazil. Analysis confirmed the introduction of DENV-4 genotype I into Brazil from South-East Asia, and at least three introductions of DENV-4 genotype II in Brazil since 2002: two from Venezuela to Roraima, and one from Colombia to Amazonas. DENV-4 also appears to have been recently introduced into Pará State from the Caribbean region |

| Source:<br>first<br>author,<br>year [Ref] | Region/<br>geographical area | Study type | Study design                                                                                                                                                                                                                                                                                                                                                                                            | Data<br>period:<br>date<br>range/<br>year | If study:                                    |                                        |                                    |           | Summary of data<br>presentation or<br>results/conclusion |
|-------------------------------------------|------------------------------|------------|---------------------------------------------------------------------------------------------------------------------------------------------------------------------------------------------------------------------------------------------------------------------------------------------------------------------------------------------------------------------------------------------------------|-------------------------------------------|----------------------------------------------|----------------------------------------|------------------------------------|-----------|----------------------------------------------------------|
|                                           |                              |            |                                                                                                                                                                                                                                                                                                                                                                                                         |                                           | No. patients/<br>population<br>studied (M:F) | Diagnosi<br>s<br>(DF/DHF/<br>DSS etc.) | Serotype/<br>genotype<br>(lineage) | Age range |                                                          |
|                                           |                              |            | GSFLX+<br>System(454LifeS<br>ciences,Branford<br>,CT,USA). All 5'<br>and 3' rapid<br>amplification of<br>cDNA ends<br>amplicons were<br>cloned into a<br>plasmid bacterial<br>system by using<br>the TOPOTA<br>Cloning Kit<br>(Invitrogen) and<br>bidirectionally<br>sequenced using<br>the ABIPrism<br>BigDye<br>Terminator v1.1<br>Cycle<br>Sequencing Kit<br>on an ABI Prism<br>3130 DNA<br>analyser |                                           |                                              |                                        |                                    |           |                                                          |

| Source: first author, year [Ref] | Region/ geographical area                                         | Study type                                                                                           | Study design                                                                                                                                                                                                                                                                                                                                                                                                                                                              | Data period: date range/ year                                                                     | If study:                                         |                              |                                                    |           | Summary of data presentation or results/conclusion                                                                                                                                                                                                                                                                                                                                                                                                                                                                                                                                                                                                                                                                                                                                                                                                                                                                                                                                                                            |
|----------------------------------|-------------------------------------------------------------------|------------------------------------------------------------------------------------------------------|---------------------------------------------------------------------------------------------------------------------------------------------------------------------------------------------------------------------------------------------------------------------------------------------------------------------------------------------------------------------------------------------------------------------------------------------------------------------------|---------------------------------------------------------------------------------------------------|---------------------------------------------------|------------------------------|----------------------------------------------------|-----------|-------------------------------------------------------------------------------------------------------------------------------------------------------------------------------------------------------------------------------------------------------------------------------------------------------------------------------------------------------------------------------------------------------------------------------------------------------------------------------------------------------------------------------------------------------------------------------------------------------------------------------------------------------------------------------------------------------------------------------------------------------------------------------------------------------------------------------------------------------------------------------------------------------------------------------------------------------------------------------------------------------------------------------|
|                                  |                                                                   |                                                                                                      |                                                                                                                                                                                                                                                                                                                                                                                                                                                                           |                                                                                                   | No. patients/ population studied (M:F)            | Diagnoses (DF/DHF/ DSS etc.) | Serotype/ genotype (lineage)                       | Age range |                                                                                                                                                                                                                                                                                                                                                                                                                                                                                                                                                                                                                                                                                                                                                                                                                                                                                                                                                                                                                               |
| Ocazonez 2006 [C]                | Colombia (Bucaramanga and its metropolitan area, Santander state) | Longitudinal, serotype-specific study consisting of a surveillance study and a cross-sectional study | Surveillance study: patients coming to hospitals and private clinics were clinically examined and a blood samples was taken for routine laboratory tests. Cases were considered dengue laboratory-positive if an IgM-antibody-capture test was positive. Cross-sectional study: a standardised questionnaire was administered to collect demographic and clinical information. An acute sample was collected on the day of admission and a second sample 10–20 days later | Surveillance study: March 1998 to December 2002; Cross-sectional study: May 2003 to December 2004 | Acute-phase serum samples from patients (N=1,452) | DF, DHF                      | DENV-1<br>DENV-2<br>DENV-3, genotype III<br>DENV-4 |           | 596/1,452 (41.0%) confirmed dengue infection; serotypes over the study period: DENV-3 subtype C (58.2%), DENV-2 (22.8%), DENV-1 (11.0%), DENV-4 (7.8%). At least 3 dengue serotypes have co-circulated in Bucaramanga and its metropolitan area since 1998. An annual increase in primary dengue infections (from 13.7 to 81.4%) correlated with frequency of DENV-3 ( $r=0.83$ ; $p=0.038$ ). DENV-2 predominance in 2000–01 (17/35 isolates; 48.5%) coincided with highest DHF frequency (242/3192 cases; 7.6%). The 2001 outbreak was associated with re-introduction of DENV-3 (36%), which together with DENV-2 (40%) comprised the most prevalent serotypes, followed by DENV-4 (20%) and DENV-1 (4%). In 2002–03, DENV-3 became the most prevalent serotype (94.5%) and dengue activity remained high. DENV-3 predominance in 2003–04 (52/59 isolates; 88.1%) coincided with a decrease in the frequency of DHF cases (197/4423 cases; 4.4%), versus 2000–1. DHF was significantly more common in DENV-2- than DENV-3- |

| Source: first author, year [Ref] | Region/ geographical area | Study type                           | Study design                                                                                                                       | Data period: date range/ year | If study:                                                    |                              |                                                                                                                                                                                                                                                                        |           | Summary of data presentation or results/conclusion                                                                                                                                                                                                                                                                       |
|----------------------------------|---------------------------|--------------------------------------|------------------------------------------------------------------------------------------------------------------------------------|-------------------------------|--------------------------------------------------------------|------------------------------|------------------------------------------------------------------------------------------------------------------------------------------------------------------------------------------------------------------------------------------------------------------------|-----------|--------------------------------------------------------------------------------------------------------------------------------------------------------------------------------------------------------------------------------------------------------------------------------------------------------------------------|
|                                  |                           |                                      |                                                                                                                                    |                               | No. patients/ population studied (M:F)                       | Diagnoses (DF/DHF/ DSS etc.) | Serotype/ genotype (lineage)                                                                                                                                                                                                                                           | Age range |                                                                                                                                                                                                                                                                                                                          |
|                                  |                           |                                      |                                                                                                                                    |                               |                                                              |                              |                                                                                                                                                                                                                                                                        |           | infected patients: 27.5 vs 10.9% (p<0.05)                                                                                                                                                                                                                                                                                |
| Oliveira 2010 [34]               | Brazil (Rio de Janeiro)   | Phylogenetic analysis and sequencing | Comparative: DENV-2 isolates from these epidemic periods were subjected to sequencing and comparison (no further details provided) | 1986–2008                     | DENV-2 isolates from the epidemic periods (number not given) | DF                           | DENV-2 American/Asian genotype (distinct lineages between isolates from the 1990/1998 epidemics and the 2007/2008 epidemics) Comparison of amino acid sequences from 1998 and 2008 strains found 6 amino acid substitutions in the envelope gene: V129I, L131Q, I170T, |           | DENV-2 isolates from 2007–8 formed a separate and distinct group from the 1990 and 1998 DENV-2 isolates, demonstrating a temporal circulation of genetically different viruses in Rio de Janeiro that could have arisen from local DENV-2 evolution since its introduction in 1990, or emergence of a new DENV-2 lineage |

| Source: first author, year [Ref] | Region/geographical area                 | Study type                           | Study design                                                                                                                                                                                                                                                         | Data period: date range/year                                     | If study:                                                                                                                                                                                   |                             |                             |                      | Summary of data presentation or results/conclusion                                                                                                                                                                                                                                                                                                                                                                                                                                                                                                                               |
|----------------------------------|------------------------------------------|--------------------------------------|----------------------------------------------------------------------------------------------------------------------------------------------------------------------------------------------------------------------------------------------------------------------|------------------------------------------------------------------|---------------------------------------------------------------------------------------------------------------------------------------------------------------------------------------------|-----------------------------|-----------------------------|----------------------|----------------------------------------------------------------------------------------------------------------------------------------------------------------------------------------------------------------------------------------------------------------------------------------------------------------------------------------------------------------------------------------------------------------------------------------------------------------------------------------------------------------------------------------------------------------------------------|
|                                  |                                          |                                      |                                                                                                                                                                                                                                                                      |                                                                  | No. patients/population studied (M:F)                                                                                                                                                       | Diagnoses (DF/DHF/DSS etc.) | Serotype/genotype (lineage) | Age range            |                                                                                                                                                                                                                                                                                                                                                                                                                                                                                                                                                                                  |
|                                  |                                          |                                      |                                                                                                                                                                                                                                                                      |                                                                  |                                                                                                                                                                                             |                             | E203D, M340T and I380V      |                      |                                                                                                                                                                                                                                                                                                                                                                                                                                                                                                                                                                                  |
| PAHO 2015 [27]                   | WHO PAHO region                          | Surveillance data                    | Surveillance data                                                                                                                                                                                                                                                    | Ongoing surveillance data; data extracted for review period only | Country population                                                                                                                                                                          | N/A                         | DENV-1,-2,-3 and -4         | Country demographics | Over the review period, the number of countries where more than one DENV serotype circulates steadily increased and all four serotypes were present and co-circulated in many countries                                                                                                                                                                                                                                                                                                                                                                                          |
| Peyrefitte 2003 [79]             | Martinique (French West Indies)          | Phylogenetic analysis and sequencing | Open: DENV infection identified by the presence of IgM, the elevation of specific IgG, or both, using DENV-specific ELISA. DENV-3 was identified by indirect immunofluorescence assay. Of 28 isolates, 5 were chosen randomly for partial sequencing (no data given) | 1999–2002                                                        | November 1999 to December 2001: patients with dengue-like symptoms (n=97); September 2001 to January 2002: isolates from patients hospitalised with severe infection or outpatients (n=371) |                             | DENV-3, subtype III         |                      | 1999–2011: 97/97 (100%) confirmed dengue infection; serotype: DENV-3 (100%). 2001–2002: 134/371 (36.1%) confirmed dengue infection; serotypes: DENV-3 (99.3%), DENV-2 (0.7%). DENV-3 strains isolated in Martinique were closely related to each other, and with strains from Sri Lanka (isolated in 2000), the Philippines (reference strain D3PhilH87), Brazil, Guatemala and Mexico. This may indicate the existence of a Martinique-specific DENV-3 genotype, and a common origin in South-East Asia for all DENV-3 strains circulating in the American and Caribbean region |
| Peyrefitte 2005 [80]             | Saint Martin island (French West Indies) | Phylogenetic analysis and sequencing | Comparative: DENV-3 was isolated (from blood samples) and partial genomic                                                                                                                                                                                            | October 2003 to April 2004                                       | Patients with dengue-like symptoms (n=180)                                                                                                                                                  | Dengue-like syndrome        | DENV-3 genotype III         |                      | 108/180 (60%) confirmed dengue infection; 12 hospitalised; incidence rate: 180/29,000 (~0.62%); serotype (6 samples tested): DENV-3 (100%). Saint Martin                                                                                                                                                                                                                                                                                                                                                                                                                         |



| Source: first author, year [Ref] | Region/ geographical area | Study type                           | Study design                                                                                                                                                                                                                                                                                            | Data period: date range/ year | If study:                                                                        |                              |                                                                                                                                                                                                 |           | Summary of data presentation or results/conclusion                                                                                                                                                                                                                                                                                                                                                                                                                             |
|----------------------------------|---------------------------|--------------------------------------|---------------------------------------------------------------------------------------------------------------------------------------------------------------------------------------------------------------------------------------------------------------------------------------------------------|-------------------------------|----------------------------------------------------------------------------------|------------------------------|-------------------------------------------------------------------------------------------------------------------------------------------------------------------------------------------------|-----------|--------------------------------------------------------------------------------------------------------------------------------------------------------------------------------------------------------------------------------------------------------------------------------------------------------------------------------------------------------------------------------------------------------------------------------------------------------------------------------|
|                                  |                           |                                      |                                                                                                                                                                                                                                                                                                         |                               | No. patients/ population studied (M:F)                                           | Diagnoses (DF/DHF/ DSS etc.) | Serotype/ genotype (lineage)                                                                                                                                                                    | Age range |                                                                                                                                                                                                                                                                                                                                                                                                                                                                                |
|                                  |                           |                                      | sequences were determined to evaluate the origin; spread and sequences were compared with those in the GenBank database<br>Sequencing method: viral RNA was extracted; 2 overlapping viral cDNA fragments were generated; PCR products were directly sequenced with the BigDye Sequencing kit (Applera) |                               |                                                                                  |                              |                                                                                                                                                                                                 |           | island DENV-3 isolates from 2003–4 were found to have a common origin with DENV-3 isolated in Martinique in 2001–2                                                                                                                                                                                                                                                                                                                                                             |
| Ramírez 2010 [64]                | Venezuela                 | Phylogenetic analysis and sequencing | Open: 29 Venezuelan DENV-3 genotype III E-gene sequences representing strains isolated between 2000 and 2007 in seven different Venezuelan geographic locations, were aligned with 58 sequences from DENV-3 genotype III E-                                                                             | 2001–2008                     | E-gene sequences from DENV-3 genotype 3 isolates (n=29), and from GenBank (n=69) |                              | DENV-3 genotype III (predominantly cluster A)<br><br>Amino acid substitution at position 329 of domain III of the E protein (alanine to valine) in almost all E proteins from Cluster A strains |           | DENV-3 genotype III strains belonging to 3 different clusters (A to C) were observed in Venezuela, revealing several introduction events. The evolutionary rate for cluster A strains circulating in Venezuela ( $8.48 \times 10^{-4}$ substitutions/site/year) is similar to that previously established for this genotype in other regions of the world, suggesting a lack of correlation among DENV-3 genotype III substitution rate and ecological pattern of virus spread |

| Source: first author, year [Ref] | Region/ geographical area | Study type                           | Study design                                                                                                                                                                                                                                                                                                                           | Data period: date range/ year | If study:                                                                              |                              |                                                            |           | Summary of data presentation or results/conclusion                                                                                                                                                                                                                                                                                                        |
|----------------------------------|---------------------------|--------------------------------------|----------------------------------------------------------------------------------------------------------------------------------------------------------------------------------------------------------------------------------------------------------------------------------------------------------------------------------------|-------------------------------|----------------------------------------------------------------------------------------|------------------------------|------------------------------------------------------------|-----------|-----------------------------------------------------------------------------------------------------------------------------------------------------------------------------------------------------------------------------------------------------------------------------------------------------------------------------------------------------------|
|                                  |                           |                                      |                                                                                                                                                                                                                                                                                                                                        |                               | No. patients/ population studied (M:F)                                                 | Diagnoses (DF/DHF/ DSS etc.) | Serotype/ genotype (lineage)                               | Age range |                                                                                                                                                                                                                                                                                                                                                           |
|                                  |                           |                                      | gene of DENV isolated in Latin America and 11 DENV-3 sequences from strains isolated elsewhere representing other DENV-3 genotypes<br>Sequencing method: viral RNA was extracted and reverse transcribed to cDNA; amplicons were purified and the sequence reaction was carried out using the Big Dye DNA sequencing kit (PerkinElmer) |                               |                                                                                        |                              |                                                            |           |                                                                                                                                                                                                                                                                                                                                                           |
| Regato 2008 [63]                 | Ecuador                   | Phylogenetic analysis and sequencing | Comparative: sequencing and phylogenetic analysis of 23 Ecuadorian DENV NS5 sequences plus 56 comparable sequences from DENV strains isolated elsewhere<br>Sequencing method: DENV-                                                                                                                                                    | 2000–2007                     | NS5 sequences from DENV isolates from sera of patients (n=23), and from GenBank (n=56) | Dengue-like syndrome         | DENV-1<br>DENV-2,<br>American genotype<br>DENV-3<br>DENV-4 |           | 23/23 (100%) confirmed dengue infection. Ecuadorian strains were found to be closely related to DENV isolates of Caribbean origin. Although the Ecuadorian strains do not cluster with the Brazilian DENV-3 strain (EF110568) included in this study, revealing a different evolutionary history, very recent studies suggest that DENV-3 might have also |

| Source: first author, year [Ref] | Region/ geographical area | Study type                           | Study design                                                                                                                                                                                                                                                                                                                                         | Data period: date range/ year | If study:                                                                                              |                                                                                          |                              |           | Summary of data presentation or results/conclusion                                                                                                                                                                                                                                                                                                                                                                                                     |
|----------------------------------|---------------------------|--------------------------------------|------------------------------------------------------------------------------------------------------------------------------------------------------------------------------------------------------------------------------------------------------------------------------------------------------------------------------------------------------|-------------------------------|--------------------------------------------------------------------------------------------------------|------------------------------------------------------------------------------------------|------------------------------|-----------|--------------------------------------------------------------------------------------------------------------------------------------------------------------------------------------------------------------------------------------------------------------------------------------------------------------------------------------------------------------------------------------------------------------------------------------------------------|
|                                  |                           |                                      |                                                                                                                                                                                                                                                                                                                                                      |                               | No. patients/ population studied (M:F)                                                                 | Diagnoses (DF/DHF/ DSS etc.)                                                             | Serotype/ genotype (lineage) | Age range |                                                                                                                                                                                                                                                                                                                                                                                                                                                        |
|                                  |                           |                                      | positive serum samples underwent RT-PCR. The sequence reaction was carried out using the Big Dye DNA sequencing kit (Perkin-Elmer) on a 373 DNA sequencer apparatus (Perkin-Elmer)                                                                                                                                                                   |                               |                                                                                                        |                                                                                          |                              |           | been introduced to Brazil from the Caribbean region                                                                                                                                                                                                                                                                                                                                                                                                    |
| Roca 2009 [57]                   | Bolivia                   | Phylogenetic analysis and sequencing | Comparative: isolates were sequences and compared with 2 E-gene sequences available in GenBank and previously produced from Bolivian strains isolated in 1997 Sequencing method: the complete viral E-gene was then amplified using PCR; amplicons were directly sequenced and viral nucleotide sequences of each dengue serotype were aligned using | 1998–2008                     | E-gene sequences from DENV isolates (n=64; DENV-1: 16, DENV-2: 23, DENV-3: 25), and from GenBank (n=2) | DENV-1, American–African genotype V DENV-2, Asian-American genotype DENV-3, genotype III |                              |           | In Bolivia, closely related DENV viruses circulated during the several consecutive years of the study (5, 6 and 6 years for DENV-1, DENV-2, and DENV-3, respectively). Co-circulation of up to 3 serotypes was observed. Emergence of new variants, distinct from those identified during previous outbreaks, occurred for DENV-1 (2007 outbreak) and DENV-2 (2001 outbreak). In all cases, DENV viruses likely originated from neighbouring countries |

| Source: first author, year [Ref] | Region/ geographical area         | Study type                           | Study design                                                                                                                                                                                                                                                                                                                                                 | Data period: date range/ year | If study:                                                                                                                                                                 |                              |                                                                                   |           | Summary of data presentation or results/conclusion                                                                                                                                                                                                                                                                 |
|----------------------------------|-----------------------------------|--------------------------------------|--------------------------------------------------------------------------------------------------------------------------------------------------------------------------------------------------------------------------------------------------------------------------------------------------------------------------------------------------------------|-------------------------------|---------------------------------------------------------------------------------------------------------------------------------------------------------------------------|------------------------------|-----------------------------------------------------------------------------------|-----------|--------------------------------------------------------------------------------------------------------------------------------------------------------------------------------------------------------------------------------------------------------------------------------------------------------------------|
|                                  |                                   |                                      |                                                                                                                                                                                                                                                                                                                                                              |                               | No. patients/ population studied (M:F)                                                                                                                                    | Diagnoses (DF/DHF/ DSS etc.) | Serotype/ genotype (lineage)                                                      | Age range |                                                                                                                                                                                                                                                                                                                    |
|                                  |                                   |                                      | ClustalX together with relevant sequences retrieved from GenBank                                                                                                                                                                                                                                                                                             |                               |                                                                                                                                                                           |                              |                                                                                   |           |                                                                                                                                                                                                                                                                                                                    |
| Rodriguez-Roche 2005 [78]        | Cuba (Havana)                     | Phylogenetic analysis and sequencing | Open: the complete E-gene sequences of isolates from both outbreaks were determined. To assist in this analysis, a DENV-3 strain representing the 1994 Nicaraguan epidemic was sequenced<br>Sequencing method: viral RNA was extracted and the E-gene was amplified using RT-PCR. Double-stranded sequencing of the E-gene was conducted on an ABI sequencer | 2000–2001                     | DENV-3 E-gene sequences from patient sera (n=2) and the spleen of a deceased patient (n=1), and a reference DENV-3 strain representing the 1994 Nicaraguan epidemic (n=1) |                              | DENV-3, genotype III                                                              |           | An Asian DENV-3 virus assigned to genotype III appears to have evolved <i>in situ</i> and been circulating in the Caribbean region since 1994. By comparing the amino acid sequences of the Cuban isolates with other DENV-3 strains assigned to genotype III, several distinct amino acid replacements were noted |
| Rodriguez-Roche 2012 [58]        | Venezuela (Maracay, Aragua state) | Phylogenetic analysis and sequencing | Open: 21 DENV full-length genomes representing all 4 serotypes were amplified and sequenced                                                                                                                                                                                                                                                                  | November 2006 to April 2007   | Genomic sequences (n=21) from DENV isolates (n=31) from acute-phase                                                                                                       | Severe and non-severe DF     | DENV-1, genotype III (three clusters)<br>DENV-2, American genotype (1987 isolate) |           | 31/50 (62%) confirmed dengue infection; serotypes: DENV-1 (n=10), DENV-2 (n=10), DENV-3 (n=2), DENV-4 (n=9). Only DENV-2 was associated with severe disease, and only one                                                                                                                                          |

| Source: first author, year [Ref] | Region/ geographical area                              | Study type                           | Study design                                                                                                                                                                                                                                                                                                                                                    | Data period: date range/ year | If study:                                                  |                              |                                                                                                                                                                                                                                  |            | Summary of data presentation or results/conclusion                                                                                                                                                                                                                                                                                                                                                       |
|----------------------------------|--------------------------------------------------------|--------------------------------------|-----------------------------------------------------------------------------------------------------------------------------------------------------------------------------------------------------------------------------------------------------------------------------------------------------------------------------------------------------------------|-------------------------------|------------------------------------------------------------|------------------------------|----------------------------------------------------------------------------------------------------------------------------------------------------------------------------------------------------------------------------------|------------|----------------------------------------------------------------------------------------------------------------------------------------------------------------------------------------------------------------------------------------------------------------------------------------------------------------------------------------------------------------------------------------------------------|
|                                  |                                                        |                                      |                                                                                                                                                                                                                                                                                                                                                                 |                               | No. patients/ population studied (M:F)                     | Diagnoses (DF/DHF/ DSS etc.) | Serotype/ genotype (lineage)                                                                                                                                                                                                     | Age range  |                                                                                                                                                                                                                                                                                                                                                                                                          |
|                                  |                                                        |                                      | directly from the serum samples<br>Sequencing method: viral RNA was extracted and, following PCR, direct sequencing of PCR products was carried out using an Applied Biosystems BigDye ddNTP capillary sequencer. The chromatograms from capillary sequencing were assembled into a specimen consensus sequence using SeqScape version 2.5 (Applied Biosystems) |                               | patient sera (n=50)                                        |                              | DENV-2, American-Asian genotype (cluster A, isolates from 1990s; cluster B, isolates from 2006–2007)<br>DENV-3, genotype III (all but two isolates clustered together)<br>DENV-4, genotype II (distinct co-circulating lineages) |            | genotype appeared to be circulating for each DENV serotype. However, extensive viral genetic diversity was found in DENV isolated from the same area during the same period, indicating significant <i>in situ</i> evolution since the introduction of these genotypes. Evidence suggests that multiple introductions of DENV have occurred from the Latin American region into Venezuela and vice versa |
| Romano 2010 [35]                 | Brazil (São Paulo state: Guarujá, Santos, Saõ Vicente) | Phylogenetic analysis and sequencing | Open: sequencing and phylogenetic analysis of partial E viral genes<br>Sequencing method: viral RNA was isolated and a 665 bp of E-region                                                                                                                                                                                                                       | 2010                          | Patients with clinically suspected DF (n=18)<br><br>(6:12) | DF, DSS, DHF                 | DENV-2, American/Asian genotype                                                                                                                                                                                                  | 1 wk–86 y. | 17/18 (94.4%) confirmed dengue infection (DHF: 1, DSS: 1);<br>Isolated strains were confirmed as DENV-2 American/Asian genotype, closely related to the strain that circulated in Rio de Janeiro during the 2007–08 epidemic, but distinct from those of earlier DENV-2 epidemics in Brazil. The most                                                                                                    |

| Source: first author, year [Ref] | Region/ geographical area | Study type                           | Study design                                                                                                                                                                                                                                                                                                                                                         | Data period: date range/ year | If study:                                                                                                                                       |                              |                              |           | Summary of data presentation or results/conclusion                                                                                                                                                                                                                                                                                                                                                                                                                                                                                 |
|----------------------------------|---------------------------|--------------------------------------|----------------------------------------------------------------------------------------------------------------------------------------------------------------------------------------------------------------------------------------------------------------------------------------------------------------------------------------------------------------------|-------------------------------|-------------------------------------------------------------------------------------------------------------------------------------------------|------------------------------|------------------------------|-----------|------------------------------------------------------------------------------------------------------------------------------------------------------------------------------------------------------------------------------------------------------------------------------------------------------------------------------------------------------------------------------------------------------------------------------------------------------------------------------------------------------------------------------------|
|                                  |                           |                                      |                                                                                                                                                                                                                                                                                                                                                                      |                               | No. patients/ population studied (M:F)                                                                                                          | Diagnoses (DF/DHF/ DSS etc.) | Serotype/ genotype (lineage) | Age range |                                                                                                                                                                                                                                                                                                                                                                                                                                                                                                                                    |
|                                  |                           |                                      | corresponding to nucleotides 1,857 to 2,522 of DENV-2 complete genome was amplified by PCR. Sequencing reactions were performed with BigDye Terminator kit                                                                                                                                                                                                           |                               |                                                                                                                                                 |                              |                              |           | recent common ancestor of the American/Asian genotype and the São Paulo and Rio de Janeiro monophyletic cluster is estimated to have appeared around 1970 and 2000, respectively                                                                                                                                                                                                                                                                                                                                                   |
| Santiago 2012 [81]               | Puerto Rico               | Phylogenetic analysis and sequencing | Open: a multiple sequence alignment of 124 complete coding sequences was made. Aligned sequences included the 92 Puerto Rico isolates from this study, an additional 22 South/Central American strains sequenced as part of the Broad Institute's Genome Resources in Dengue Consortium, and an additional 10 international strains obtained from GenBank Sequencing | 1998–2007                     | Genomic sequences from DENV-3 isolates from human sera (n=92), and from GenBank/ Broad Institute's Genome Resources in Dengue Consortium (n=32) |                              | DENV-2<br>DENV-3             |           | Two primary DENV-3 lineages (clades 1 and 2) were identified in Puerto Rico. Clade 1 consisted of two subclades (1A, 1B), both closely related to international DENV-3 isolates. Clade 2 consisted of multiple subclades, all of which emerged rapidly and almost simultaneously from the parent population. Several subclades (2A, 2E, 2F) also exhibited rapid, sustained diversification. The high mutation rates and rapid replication of DENV-3 may have produced a highly heterogeneous population structure at each lineage |

| Source: first author, year [Ref] | Region/ geographical area | Study type                                                                          | Study design                                                                                                                                                                                                                                                                                                                                                                                                 | Data period: date range/ year  | If study:                              |                                                                              |                                                                                |                                                            | Summary of data presentation or results/conclusion                                                                                                                                                        |
|----------------------------------|---------------------------|-------------------------------------------------------------------------------------|--------------------------------------------------------------------------------------------------------------------------------------------------------------------------------------------------------------------------------------------------------------------------------------------------------------------------------------------------------------------------------------------------------------|--------------------------------|----------------------------------------|------------------------------------------------------------------------------|--------------------------------------------------------------------------------|------------------------------------------------------------|-----------------------------------------------------------------------------------------------------------------------------------------------------------------------------------------------------------|
|                                  |                           |                                                                                     |                                                                                                                                                                                                                                                                                                                                                                                                              |                                | No. patients/ population studied (M:F) | Diagnoses (DF/DHF/ DSS etc.)                                                 | Serotype/ genotype (lineage)                                                   | Age range                                                  |                                                                                                                                                                                                           |
|                                  |                           |                                                                                     | method: bidirectional Sanger sequencing was performed on pooled cDNA or PCR amplicons using an ABI 3730 automated sequencer. The resulting sequence was trimmed at the ends to remove both low-quality and primer sequence and assembled resulting reads using Broad Institute's AV454 assembly algorithm. Consensus assemblies were annotated by the Broad Institute using an in-house annotation algorithm |                                |                                        |                                                                              |                                                                                |                                                            |                                                                                                                                                                                                           |
| Sharp 2013 [75]                  | Puerto Rico               | A retrospective analysis of suspected dengue cases reported to surveillance systems | Virus confirmed by RT-PCR and indirect immunofluorescence. Viral RNA extracted from culture supernatants                                                                                                                                                                                                                                                                                                     | 1 January and 31 December 2010 | 26,766 suspected dengue cases (53:47)  | Of 12,048 laboratory -positive cases, sufficient clinical data were provided | 7,426 RT-PCR-positive specimens: DENV-1 (69.0%); DENV-2 (7.3%); DENV-3 (0.1%); | Median age range (suspected cases): 18y (5 days–102 years) | 49.7% had dengue with warning signs, 11.1% had severe dengue, and 40 died. Approximately 21% of cases were primary DENV infections; 1–4 year olds were the only age group for which primary infection was |

| Source: first author, year [Ref] | Region/ geographical area                                                            | Study type                           | Study design                                                                                                                                                                                                                                   | Data period: date range/ year | If study:                                    |                                         |                                            |           | Summary of data presentation or results/conclusion                                                                                                                                                                                                                                                                                                                                                                                                                                                                                                                                                                                                                                                                                                                                                                                                                                                       |
|----------------------------------|--------------------------------------------------------------------------------------|--------------------------------------|------------------------------------------------------------------------------------------------------------------------------------------------------------------------------------------------------------------------------------------------|-------------------------------|----------------------------------------------|-----------------------------------------|--------------------------------------------|-----------|----------------------------------------------------------------------------------------------------------------------------------------------------------------------------------------------------------------------------------------------------------------------------------------------------------------------------------------------------------------------------------------------------------------------------------------------------------------------------------------------------------------------------------------------------------------------------------------------------------------------------------------------------------------------------------------------------------------------------------------------------------------------------------------------------------------------------------------------------------------------------------------------------------|
|                                  |                                                                                      |                                      |                                                                                                                                                                                                                                                |                               | No. patients/ population studied (M:F)       | Diagnoses (DF/DHF/ DSS etc.)            | Serotype/ genotype (lineage)               | Age range |                                                                                                                                                                                                                                                                                                                                                                                                                                                                                                                                                                                                                                                                                                                                                                                                                                                                                                          |
|                                  |                                                                                      |                                      | using the M48 BioRobot System (Qiagen; Valencia, CA). The E glycoprotein gene was amplified and sequenced. Multiple sequence alignment performed in MEGA 5 (megasoftware.net). Phylogenetic trees rendered using the maximum likelihood method |                               |                                              | to classify 74.0% as DF and 2.4% as DHF | DENV-4 (23.6%)                             |           | more common than secondary. Individuals infected with DENV-1 were 4.2 (95% confidence interval [CI]: 1.7–9.8) and 4.0 (95% CI: 2.4–6.5) times more likely to have primary infection than those infected with DENV-2 or -4, respectively. Sequencing and phylogenetic analyses of randomly selected DENV isolates showed that DENV-1 belonged to the American-African genotype (genotype V) to a clade distinct from virus isolated during the 1998 Puerto Rico epidemic. Close ascendants of the 2010 DENV-1 clade had been circulating in Puerto Rico and the Caribbean since at least 2006. DENV-2 sequencing: the virus belongs to clade 1B of the American-Asian genotype (genotype IIIb; DENV-4 belonged to the Indonesian genotype (genotype II), but was distinct from virus isolated in 1998. Viruses closely-related to the 2010 DENV-4 isolate were first detected in Puerto Rico in 2004 [70] |
| Usme-Ciro 2008 [60]              | Colombia (Antioquia, Caquetá, Guaviare, Huila, La Guajira, Meta, Norte de Santander, | Phylogenetic analysis and sequencing | Open: serotype confirmed using serotype-specific monoclonal antibodies                                                                                                                                                                         | 2002–2005                     | E-gene sequences from DENV-3 isolates (n=32) |                                         | DENV-3, genotype I<br>DENV-3, genotype III |           | DENV-3 appeared to be circulating in Colombia since 2002. Importantly, genotype I (South-East Asia/South Pacific genotype) was                                                                                                                                                                                                                                                                                                                                                                                                                                                                                                                                                                                                                                                                                                                                                                           |



| Source: first author, year [Ref] | Region/ geographical area        | Study type                | Study design                                                                                                                                                                                                                                                                                | Data period: date range/ year | If study:                                                                                                                                                                               |                              |                              |           | Summary of data presentation or results/conclusion                                                                                                                                                                                                                                                                                                                                                                                                                      |
|----------------------------------|----------------------------------|---------------------------|---------------------------------------------------------------------------------------------------------------------------------------------------------------------------------------------------------------------------------------------------------------------------------------------|-------------------------------|-----------------------------------------------------------------------------------------------------------------------------------------------------------------------------------------|------------------------------|------------------------------|-----------|-------------------------------------------------------------------------------------------------------------------------------------------------------------------------------------------------------------------------------------------------------------------------------------------------------------------------------------------------------------------------------------------------------------------------------------------------------------------------|
|                                  |                                  |                           |                                                                                                                                                                                                                                                                                             |                               | No. patients/ population studied (M:F)                                                                                                                                                  | Diagnoses (DF/DHF/ DSS etc.) | Serotype/ genotype (lineage) | Age range |                                                                                                                                                                                                                                                                                                                                                                                                                                                                         |
|                                  | Putumayo, San Andrés, Santander) |                           | Sequencing/ phylogenetic analysis<br>Sequencing method: viral RNA was extracted and subjected to RT-PCR. PCR products were purified and sequencing reactions on both strands were performed with the ABI Prism Dye Terminator Cycle Sequencing Ready Reaction Kit (Applied Biosystems, USA) |                               |                                                                                                                                                                                         |                              |                              |           | detected for the first time in the Americas, co-circulating with genotype III (Indian genotype) in three states (Guaviare, Huila, La Guajira). Co-circulation of different genotypes undergoing intra-serotype antigenic variation, and the resulting differential serological and immune responses, may be a factor in the association between DENV-3 infection and disease severity, and account for the high epidemiological impact of DENV-3 in the Americas        |
| Uzcátegui 2003 [65]              | Venezuela (Aragua state)         | Molecular epidemiological | Comparative: determination of the complete sequence of the E-gene of 15 Venezuelan DENV-3 viruses isolated during 2000 and 2001<br>Sequencing method: viral RNA was extracted. Nucleotides from position 716 in the prM region to 2013 in the NS1                                           | 2000–2001                     | E-gene sequences from isolates from sera of patients with DF (n=11) and suspected DHF/DSS (n=4), strains from the 1995 Mexican DENV-3 (n=1) and 1960s Puerto Rican (n=2) outbreaks, and | DF, DHF                      | DENV-3, genotype III         |           | The DENV-3 strain circulating in Venezuela appears to be closely related to isolates that were previously present in Panama and Nicaragua in 1994, which have since spread throughout Central American countries and Mexico. It was most closely related to the Mexican isolate from the 1995 epidemic (100% bootstrap support) and a Brazilian isolate from 2000. This study confirms previous reports that the DENV-3 strain currently circulating in the Americas is |

| Source: first author, year [Ref] | Region/ geographical area                                           | Study type                           | Study design                                                                                                                                                                                                                                                                                                                   | Data period: date range/ year | If study:                                                                                                      |                              |                                          |           | Summary of data presentation or results/conclusion                                                                                                                                                                                                                                                                                                                                                                                                                                                                                                   |
|----------------------------------|---------------------------------------------------------------------|--------------------------------------|--------------------------------------------------------------------------------------------------------------------------------------------------------------------------------------------------------------------------------------------------------------------------------------------------------------------------------|-------------------------------|----------------------------------------------------------------------------------------------------------------|------------------------------|------------------------------------------|-----------|------------------------------------------------------------------------------------------------------------------------------------------------------------------------------------------------------------------------------------------------------------------------------------------------------------------------------------------------------------------------------------------------------------------------------------------------------------------------------------------------------------------------------------------------------|
|                                  |                                                                     |                                      |                                                                                                                                                                                                                                                                                                                                |                               | No. patients/ population studied (M:F)                                                                         | Diagnoses (DF/DHF/ DSS etc.) | Serotype/ genotype (lineage)             | Age range |                                                                                                                                                                                                                                                                                                                                                                                                                                                                                                                                                      |
|                                  |                                                                     |                                      | region of the DENV-3 genome encoding the prM/M, E and NS1 genes were amplified using PCR. Double-stranded sequencing of the prM/M and E-gene was performed on an ABI sequencer                                                                                                                                                 |                               | GenBank (n=50)                                                                                                 |                              |                                          |           | related to the strain that caused DHF epidemics in Sri Lanka and India in 1989–91 (genotype III)                                                                                                                                                                                                                                                                                                                                                                                                                                                     |
| Villabona-Arenas 2009 [61]       | Colombia (states of Norte de Santander, Santander, Valle del Cauca) | Phylogenetic analysis and sequencing | Comparative: viruses were isolated in and sub-typed both by indirect immunofluorescence with monoclonal antibody (CDC, Puerto Rico) or RT-PCR Sequencing method: viral RNA was extracted and cDNA was amplified by PCR. PCR products were purified and sequenced under BigDye Terminator cycling conditions by using automatic | 2001–2007                     | E-gene sequences from DENV-3 strains (n=21) and GenBank (n=98; from 13 Latin American countries and Sri Lanka) |                              | DENV-3, genotype III (clades III and IV) |           | This study confirms previous reports showing that Colombian isolates are closely related to DENV-3 genotype III. Colombian DENV-3 strains seem to have been introduced from Ecuador, Peru and Venezuela, but not from Argentina, Brazil, Paraguay or Central American countries. Colombian isolates clustered apart from Brazilian DENV-3 isolates, which were associated with a significant number of DHF cases and fatalities, suggesting that DENV-3 genotype III strains circulating in Latin America may exhibit different pathogenic potential |

| Source: first author, year [Ref] | Region/ geographical area | Study type | Study design                                                                                                                                                         | Data period: date range/ year | If study:                              |                              |                              |           | Summary of data presentation or results/conclusion |
|----------------------------------|---------------------------|------------|----------------------------------------------------------------------------------------------------------------------------------------------------------------------|-------------------------------|----------------------------------------|------------------------------|------------------------------|-----------|----------------------------------------------------|
|                                  |                           |            |                                                                                                                                                                      |                               | No. patients/ population studied (M:F) | Diagnoses (DF/DHF/ DSS etc.) | Serotype/ genotype (lineage) | Age range |                                                    |
|                                  |                           |            | sequencer 3730<br>· I in a commercial manufacturer (Macrogen, Geumchungu, Seoul, Korea)<br>Sequence assembly was performed with the Lasergene package v7.0 (DNASTAR) |                               |                                        |                              |                              |           |                                                    |

**Abbreviations:** C, capsid; CSF, cerebrospinal fluid; DENV, dengue virus; DF, dengue fever; DHF, dengue haemorrhagic fever; DSS, dengue shock syndrome; E, envelope; ELISA, enzyme-linked immunosorbent assay; GTR, general time-reversible; IgG, immunoglobulin G; IgM, immunoglobulin M; M, membrane; N/A, not available; NS, non-structural; ORF, open reading frame; PCR, polymerase chain reaction; prM, pre-membrane; qRT-PCR, quantitative reverse transcriptase-polymerase chain reaction; RT-PCR, reverse transcriptase-polymerase chain reaction; SE, standard error; UTR, untranslated region.

**Sources included in the review and cited in Supplementary Table S1 but not cited in the paper**

- A de Araujo JM, Nogueira RM, Schatzmayr HG, Zanotto PM, Bello G. Phylogeography and evolutionary history of dengue virus type 3. *Infect Genet Evol* 2009;9: 716-725.
- B Huhtamo E, Comach G, Sierra G, Camacho DE, Sironen T, Vapalahti O, et al. Diversity and composition of dengue virus type 2 in Venezuela. *Epidemiol Infect* 2013;141: 1816-1822.
- C Ocazonez RE, Cortes FM, Villar LA, Gomez SY. Temporal distribution of dengue virus serotypes in Colombian endemic area and dengue incidence. Re-introduction of dengue-3 associated to mild febrile illness and primary infection. *Mem Inst Oswaldo Cruz* 2006;101: 725-731.
